# Supplementary material for: Epidemiological characteristics of invasive meningococcal disease and carriage prevalence of Neisseria meningitidis in the Xinjiang Uygur Autonomous Region, China, 2004–2023: a retrospective study
Source: PeerJ. 2025 Jul 29;13:e19772. doi: 10.7717/peerj.19772 (PMC12315827; doi:10.7717/peerj.19772)
Supplement: Supplemental Information 1 [file peerj-13-19772-s001.xlsx]

## Sheet: Regional distribution data
2004
Regional distribution	IMD
	Incidence(1/100000)
Xinjiang	0.3064
Urumqi	0.4407
Karamay	0.6761
Turpan	0.9079
Hami	0.8128
Changji	0.2499
Bortala	-
Bayingolin	0.1837
Aksu	0.2335
Kizilsu	0.4315
Kashgar	0.3817
Hotan	0.4163
Ili	0.1589
Tacheng	-
Altay	0.363
other	-
2005
Regional distribution	IMD
	Incidence(1/100000)
Xinjiang	0.5786
Urumqi	3.5844
Karamay	-
Turpan	-
Hami	0.1908
Changji	0.0622
Bortala	-
Bayingolin	-
Aksu	0.3026
Kizilsu	0.2093
Kashgar	0.5707
Hotan	0.1645
Ili	-
Tacheng	0.1035
Altay	0.1647
other	-
2006
Regional distribution	IMD
	Incidence(1/100000)
Xinjiang	0.5622
Urumqi	0.6756
Karamay	0.3486
Turpan	-
Hami
Changji	0.0616
Bortala	-
Bayingolin	0.1757
Aksu	0.2988
Kizilsu	1.2373
Kashgar	1.663
Hotan	0.7026
Ili	0.1538
Tacheng	0.1023
Altay	0.1627
other	-
2007
Regional distribution	IMD
	Incidence(1/100000)
Xinjiang	1.1463
Urumqi	0.2038
Karamay	-
Turpan	1.6113
Hami	-
Changji	0.069
Bortala	-
Bayingolin	-
Aksu	0.2507
Kizilsu	2.8191
Kashgar	2.5189
Hotan	5.281
Ili	0.0376
Tacheng	0.1003
Altay	0.1594
other	-
2008
Regional distribution	IMD
	Incidence(1/100000)
Xinjiang	0.4105
Urumqi	0.8015
Karamay	-
Turpan	0.7867
Hami	-
Changji	0.0677
Bortala	-
Bayingolin	0.2542
Aksu	0.4081
Kizilsu	0.9808
Kashgar	0.5889
Hotan	0.4633
Ili	0.2943
Tacheng	-
Altay	-
other	0.1534
2009
Regional distribution	IMD
	Incidence(1/100000)
Xinjiang	0.5162
Urumqi	0.8717
Karamay	-
Turpan	0.3088
Hami	-
Changji	-
Bortala	0.2034
Bayingolin	0.0836
Aksu	0.3203
Kizilsu	-
Kashgar	0.7529
Hotan	2.0164
Ili	0.1806
Tacheng	-
Altay	0.1534
other	0.1519
2010
Regional distribution	IMD
	Incidence(1/100000)
Xinjiang	0.1297
Urumqi	0.3542
Karamay	-
Turpan	-
Hami	-
Changji	-
Bortala	-
Bayingolin	-
Aksu	0.0789
Kizilsu	-
Kashgar	0.1728
Hotan	0.1982
Ili	0.2137
Tacheng	-
Altay	-
other	-
2011
Regional distribution	IMD
	Incidence(1/100000)
Xinjiang	0.11
Urumqi	-
Karamay	-
Turpan	0.1605
Hami	-
Changji	-
Bortala	-
Bayingolin	0.2347
Aksu	-
Kizilsu	0.3805
Kashgar	0.3518
Hotan	0.0496
Ili	0.0806
Tacheng	0.082
Altay	-
other	-
2012
Regional distribution	IMD
	Incidence(1/100000)
Xinjiang	0.1177
Urumqi	0.3736
Karamay	-
Turpan	-
Hami	0.1736
Changji	-
Bortala	-
Bayingolin	-
Aksu	0.042
Kizilsu	0.3727
Kashgar	0.0999
Hotan	0.197
Ili	-
Tacheng	0.0807
Altay	0.1635
other	-
2013
Regional distribution	IMD
	Incidence(1/100000)
Xinjiang	0.2956
Urumqi	0.4249
Karamay	-
Turpan	0.1575
Hami	0.1735
Changji	0.3454
Bortala	-
Bayingolin	0.7597
Aksu	0.4197
Kizilsu	0.3672
Kashgar	0.3738
Hotan	0.2942
Ili	0.0774
Tacheng	-
Altay	-
other	-
2014
Regional distribution	IMD
	Incidence(1/100000)
Xinjiang	0.3798
Urumqi	0.5008
Karamay	-
Turpan	0.1556
Hami	-
Changji	-
Bortala	0.2171
Bayingolin	0.1494
Aksu	0.6682
Kizilsu	0.18
Kashgar	0.4209
Hotan	1.4585
Ili	-
Tacheng	-
Altay	-
other	0.716
2015
Regional distribution	IMD
	Incidence(1/100000)
Xinjiang	0.1175
Urumqi	0.0871
Karamay	-
Turpan	0.4597
Hami	-
Changji	-
Bortala	0.2138
Bayingolin	-
Aksu	0.3293
Kizilsu	-
Kashgar	0.1708
Hotan	0.1917
Ili	0.0373
Tacheng	-
Altay	-
other	-
2016
Regional distribution	IMD
	Incidence(1/100000)
Xinjiang	0.1949
Urumqi	0.3102
Karamay	-
Turpan	1.7405
Hami	-
Changji	-
Bortala	-
Bayingolin	-
Aksu	-
Kizilsu	-
Kashgar	0.4508
Hotan	0.1398
Ili	0.0725
Tacheng	-
Altay	-
other	-
2017
Regional distribution	IMD
	Incidence(1/100000)
Xinjiang	0.1293
Urumqi	0.0274
Karamay	-
Turpan	0.2942
Hami	-
Changji	-
Bortala	-
Bayingolin	-
Aksu	-
Kizilsu	-
Kashgar	0.541
Hotan	0.1843
Ili	-
Tacheng	-
Altay	0.151
other	-
2018
Regional distribution	IMD
	Incidence(1/100000)
Xinjiang	0.0736
Urumqi	-
Karamay	-
Turpan	0.2889
Hami	-
Changji	-
Bortala	-
Bayingolin	0.072
Aksu	-
Kizilsu	-
Kashgar	0.1848
Hotan	0.3168
Ili	-
Tacheng	-
Altay	-
other	-
2019
Regional distribution	IMD
	Incidence(1/100000)
Xinjiang	0.0201
Urumqi	0.0285
Karamay	-
Turpan	-
Hami	-
Changji	-
Bortala	-
Bayingolin	0.067
Aksu	-
Kizilsu	-
Kashgar	-
Hotan	0.0873
Ili	-
Tacheng	-
Altay	0.143
other	-
2020
Regional distribution	IMD
	Incidence(1/100000)
Xinjiang	0.0119
Urumqi	-
Karamay	-
Turpan	-
Hami	-
Changji	-
Bortala	-
Bayingolin	-
Aksu	-
Kizilsu	-
Kashgar	0.0439
Hotan	0.044
Ili	-
Tacheng	-
Altay	-
other	-
2021
Regional distribution	IMD
	Incidence(1/100000)
Xinjiang	-
Urumqi	-
Karamay	-
Turpan	-
Hami	-
Changji	-
Bortala	-
Bayingolin	-
Aksu	-
Kizilsu	-
Kashgar	-
Hotan	-
Ili	-
Tacheng	-
Altay	-
other	-
2022
Regional distribution	IMD
	Incidence(1/100000)
Xinjiang	0.0154
Urumqi	-
Karamay	-
Turpan	-
Hami	-
Changji	-
Bortala	-
Bayingolin	-
Aksu	0.0736
Kizilsu	0.1603
Kashgar	0.0223
Hotan	-
Ili	-
Tacheng	-
Altay	-
other	-
2023
Regional distribution	IMD
	Incidence(1/100000)
Xinjiang	0.0232
Urumqi	0.0488
Karamay	-
Turpan	-
Hami	-
Changji	-
Bortala	-
Bayingolin	-
Aksu	0.0745
Kizilsu	-
Kashgar	0.0453
Hotan	-
Ili	-
Tacheng	-
Altay	-
other	-

## Sheet: Survey data of N. meningitidis 
Qualitative results of oral and pharyngeal swab ctrA	years	sex	Age group（1.<3；2.3~5；3.6~10； 4.11~15；5.16~20；6.≥21）	PCR result	Regional distribution	Vaccination history
Negative	2019	female	4	negative	Southern Xinjiang	Not vaccinated
Positive	2019	female	4	Y	Southern Xinjiang	Not vaccinated
Positive	2019	female	5	Non-genogroup	Southern Xinjiang	Not vaccinated
Positive	2019	female	4	Y	Southern Xinjiang	Not vaccinated
Positive	2019	female	4	Y	Southern Xinjiang	Not vaccinated
Negative	2019	female	5	negative	Southern Xinjiang	Not vaccinated
Negative	2019	male	4	negative	Southern Xinjiang	Not vaccinated
Positive	2019	male	4	Non-genogroup	Southern Xinjiang	Not vaccinated
Positive	2019	male	4	Non-genogroup	Southern Xinjiang	Not vaccinated
Negative	2019	male	5	negative	Southern Xinjiang	Not vaccinated
Negative	2019	male	6	negative	Southern Xinjiang	Not vaccinated
Positive	2019	male	6	B	Southern Xinjiang	Not vaccinated
Negative	2019	male	6	negative	Southern Xinjiang	Not vaccinated
Positive	2019	female	6	B	Southern Xinjiang	Not vaccinated
Negative	2019	female	6	negative	Southern Xinjiang	Not vaccinated
Positive	2019	female	5	Non-genogroup	Southern Xinjiang	Not vaccinated
Negative	2019	female	6	negative	Southern Xinjiang	Not vaccinated
Negative	2019	female	6	negative	Southern Xinjiang	Not vaccinated
Negative	2019	female	6	negative	Southern Xinjiang	Not vaccinated
Negative	2019	female	6	negative	Southern Xinjiang	Not vaccinated
Negative	2019	male	4	negative	Southern Xinjiang	≥3 dose
Positive	2019	male	4	Non-genogroup	Southern Xinjiang	≥3 dose
Negative	2019	male	4	negative	Southern Xinjiang	≥3 dose
Negative	2019	male	4	negative	Southern Xinjiang	≥3 dose
Negative	2019	male	4	negative	Southern Xinjiang	≥3 dose
Positive	2019	female	4	B	Southern Xinjiang	≥3 dose
Negative	2019	female	4	negative	Southern Xinjiang	≥3 dose
Negative	2019	female	4	negative	Southern Xinjiang	≥3 dose
Negative	2019	female	3	negative	Southern Xinjiang	≥3 dose
Negative	2019	female	4	negative	Southern Xinjiang	≥3 dose
Positive	2019	male	3	Non-genogroup	Southern Xinjiang	≥3 dose
Negative	2019	female	3	negative	Southern Xinjiang	≥3 dose
Negative	2019	female	3	negative	Southern Xinjiang	≥3 dose
Negative	2019	male	3	negative	Southern Xinjiang	≥3 dose
Negative	2019	female	3	negative	Southern Xinjiang	≥3 dose
Negative	2019	male	3	negative	Southern Xinjiang	≥3 dose
Negative	2019	male	3	negative	Southern Xinjiang	≥3 dose
Positive	2019	female	3	Non-genogroup	Southern Xinjiang	≥3 dose
Negative	2019	female	3	negative	Southern Xinjiang	≥3 dose
Negative	2019	female	3	negative	Southern Xinjiang	≥3 dose
Negative	2019	female	1	negative	Southern Xinjiang	2 dose
Negative	2019	female	1	negative	Southern Xinjiang	2 dose
Negative	2019	female	1	negative	Southern Xinjiang	2 dose
Negative	2019	female	1	negative	Southern Xinjiang	≥3 dose
Negative	2019	female	1	negative	Southern Xinjiang	≥3 dose
Negative	2019	male	1	negative	Southern Xinjiang	2 dose
Negative	2019	male	1	negative	Southern Xinjiang	2 dose
Negative	2019	female	1	negative	Southern Xinjiang	≥3 dose
Negative	2019	female	1	negative	Southern Xinjiang	2 dose
Negative	2019	female	1	negative	Southern Xinjiang	≥3 dose
Negative	2019	male	1	negative	Southern Xinjiang	2 dose
Negative	2019	female	1	negative	Southern Xinjiang	Not vaccinated
Negative	2019	female	1	negative	Southern Xinjiang	2 dose
Positive	2019	female	1	B	Southern Xinjiang	2 dose
Negative	2019	male	1	negative	Southern Xinjiang	2 dose
Negative	2019	female	1	negative	Southern Xinjiang	2 dose
Negative	2019	female	1	negative	Southern Xinjiang	2 dose
Negative	2019	female	1	negative	Southern Xinjiang	2 dose
Negative	2019	male	1	negative	Southern Xinjiang	2 dose
Negative	2019	male	1	negative	Southern Xinjiang	2 dose
Positive	2019	female	4	Y	Southern Xinjiang	≥3 dose
Positive	2019	female	2	Non-genogroup	Southern Xinjiang	≥3 dose
Negative	2019	female	3	negative	Southern Xinjiang	≥3 dose
Negative	2019	male	4	negative	Southern Xinjiang	≥3 dose
Negative	2019	female	4	negative	Southern Xinjiang	≥3 dose
Negative	2019	female	3	negative	Southern Xinjiang	≥3 dose
Positive	2019	female	4	Non-genogroup	Southern Xinjiang	≥3 dose
Negative	2019	female	4	negative	Southern Xinjiang	1 dose
Positive	2019	female	4	B	Southern Xinjiang	≥3 dose
Negative	2019	male	4	negative	Southern Xinjiang	1 dose
Negative	2019	female	1	negative	Southern Xinjiang	2 dose
Positive	2019	male	1	Non-genogroup	Southern Xinjiang	1 dose
Negative	2019	male	1	negative	Southern Xinjiang	2 dose
Negative	2019	female	1	negative	Southern Xinjiang	1 dose
Negative	2019	male	1	negative	Southern Xinjiang	Not vaccinated
Negative	2019	male	1	negative	Southern Xinjiang	Not vaccinated
Negative	2019	male	1	negative	Southern Xinjiang	2 dose
Negative	2019	male	1	negative	Southern Xinjiang	2 dose
Negative	2019	female	1	negative	Southern Xinjiang	Not vaccinated
Negative	2019	female	1	negative	Southern Xinjiang	2 dose
Positive	2019	male	2	Non-genogroup	Southern Xinjiang	2 dose
Positive	2019	male	1	Non-genogroup	Southern Xinjiang	≥3 dose
Negative	2019	male	2	negative	Southern Xinjiang	≥3 dose
Negative	2019	female	1	negative	Southern Xinjiang	2 dose
Positive	2019	male	3	Non-genogroup	Southern Xinjiang	≥3 dose
Negative	2019	male	1	negative	Southern Xinjiang	1 dose
Negative	2019	male	4	negative	Southern Xinjiang	Not vaccinated
Negative	2019	male	4	negative	Southern Xinjiang	Not vaccinated
Negative	2019	male	5	negative	Southern Xinjiang	Not vaccinated
Negative	2019	male	5	negative	Southern Xinjiang	Not vaccinated
Negative	2019	male	5	negative	Southern Xinjiang	Not vaccinated
Negative	2019	female	6	negative	Southern Xinjiang	Not vaccinated
Positive	2019	female	6	B	Southern Xinjiang	Not vaccinated
Positive	2019	female	6	Non-genogroup	Southern Xinjiang	Not vaccinated
Negative	2019	female	5	negative	Southern Xinjiang	Not vaccinated
Positive	2019	female	6	Non-genogroup	Southern Xinjiang	Not vaccinated
Negative	2019	female	6	negative	Southern Xinjiang	Not vaccinated
Positive	2019	female	5	B	Southern Xinjiang	Not vaccinated
Negative	2019	female	5	negative	Southern Xinjiang	Not vaccinated
Negative	2019	female	5	negative	Southern Xinjiang	Not vaccinated
Negative	2019	male	5	negative	Southern Xinjiang	Not vaccinated
Negative	2019	male	4	negative	Southern Xinjiang	≥3 dose
Positive	2019	male	3	B	Southern Xinjiang	≥3 dose
Positive	2019	male	4	Non-genogroup	Southern Xinjiang	Not vaccinated
Positive	2019	male	3	B	Southern Xinjiang	≥3 dose
Negative	2019	male	3	negative	Southern Xinjiang	≥3 dose
Negative	2019	male	2	negative	Southern Xinjiang	≥3 dose
Positive	2019	female	3	Non-genogroup	Southern Xinjiang	≥3 dose
Positive	2019	male	2	Non-genogroup	Southern Xinjiang	≥3 dose
Positive	2019	male	2	Non-genogroup	Southern Xinjiang	≥3 dose
Negative	2019	female	5	negative	Southern Xinjiang	Not vaccinated
Negative	2019	male	6	negative	Southern Xinjiang	Not vaccinated
Negative	2019	female	5	negative	Southern Xinjiang	Not vaccinated
Negative	2019	female	5	negative	Southern Xinjiang	Not vaccinated
Negative	2019	female	6	negative	Southern Xinjiang	Not vaccinated
Negative	2019	female	5	negative	Southern Xinjiang	Not vaccinated
Positive	2019	male	5	Y	Southern Xinjiang	Not vaccinated
Positive	2019	male	6	B	Southern Xinjiang	Not vaccinated
Negative	2019	male	6	negative	Southern Xinjiang	Not vaccinated
Negative	2019	male	6	negative	Southern Xinjiang	Not vaccinated
Negative	2019	male	3	negative	Southern Xinjiang	≥3 dose
Positive	2019	male	3	Non-genogroup	Southern Xinjiang	≥3 dose
Negative	2019	female	2	negative	Southern Xinjiang	1 dose
Positive	2019	male	5	B	Southern Xinjiang	Not vaccinated
Negative	2019	male	1	negative	Southern Xinjiang	1 dose
Positive	2019	male	1	B	Southern Xinjiang	1 dose
Negative	2019	female	1	negative	Southern Xinjiang	Not vaccinated
Negative	2019	female	1	negative	Southern Xinjiang	1 dose
Negative	2019	male	1	negative	Southern Xinjiang	1 dose
Negative	2019	male	1	negative	Southern Xinjiang	1 dose
Negative	2019	male	1	negative	Southern Xinjiang	Not vaccinated
Positive	2019	male	1	Non-genogroup	Southern Xinjiang	Not vaccinated
Positive	2019	male	1	Non-genogroup	Southern Xinjiang	1 dose
Negative	2019	male	1	negative	Southern Xinjiang	2 dose
Negative	2019	female	1	negative	Southern Xinjiang	2 dose
Negative	2019	male	1	negative	Southern Xinjiang	2 dose
Positive	2019	male	1	Non-genogroup	Southern Xinjiang	2 dose
Negative	2019	female	1	negative	Southern Xinjiang	2 dose
Negative	2019	female	1	negative	Southern Xinjiang	≥3 dose
Negative	2019	female	1	negative	Southern Xinjiang	2 dose
Negative	2019	female	1	negative	Southern Xinjiang	≥3 dose
Negative	2019	male	1	negative	Southern Xinjiang	≥3 dose
Negative	2019	male	1	negative	Southern Xinjiang	2 dose
Negative	2019	male	3	negative	Southern Xinjiang	2 dose
Negative	2019	female	3	negative	Southern Xinjiang	≥3 dose
Positive	2019	female	3	Non-genogroup	Southern Xinjiang	≥3 dose
Negative	2019	male	2	negative	Southern Xinjiang	≥3 dose
Negative	2019	female	2	negative	Southern Xinjiang	2 dose
Negative	2019	female	3	negative	Southern Xinjiang	≥3 dose
Negative	2019	male	3	negative	Southern Xinjiang	≥3 dose
Negative	2019	female	3	negative	Southern Xinjiang	≥3 dose
Positive	2019	female	3	Non-genogroup	Southern Xinjiang	≥3 dose
Negative	2019	male	3	negative	Southern Xinjiang	≥3 dose
Negative	2019	female	3	negative	Southern Xinjiang	2 dose
Negative	2019	male	4	negative	Southern Xinjiang	2 dose
Positive	2019	female	3	B	Southern Xinjiang	2 dose
Negative	2019	male	3	negative	Southern Xinjiang	2 dose
Negative	2019	male	4	negative	Southern Xinjiang	Not vaccinated
Positive	2019	female	4	Non-genogroup	Southern Xinjiang	Not vaccinated
Negative	2019	female	5	negative	Southern Xinjiang	Not vaccinated
Negative	2019	female	4	negative	Southern Xinjiang	Not vaccinated
Negative	2019	male	4	negative	Southern Xinjiang	≥3 dose
Negative	2019	male	4	negative	Southern Xinjiang	≥3 dose
Positive	2019	female	6	B	Southern Xinjiang	Not vaccinated
Negative	2019	female	5	negative	Southern Xinjiang	Not vaccinated
Negative	2019	female	3	negative	Southern Xinjiang	≥3 dose
Negative	2019	female	5	negative	Southern Xinjiang	Not vaccinated
Negative	2019	female	6	negative	Southern Xinjiang	Not vaccinated
Negative	2019	male	5	negative	Southern Xinjiang	Not vaccinated
Positive	2019	male	6	B	Southern Xinjiang	Not vaccinated
Positive	2019	male	6	B	Southern Xinjiang	Not vaccinated
Positive	2019	male	5	B	Southern Xinjiang	Not vaccinated
Positive	2019	male	6	Non-genogroup	Southern Xinjiang	Not vaccinated
Positive	2019	male	5	Non-genogroup	Southern Xinjiang	Not vaccinated
Positive	2019	male	5	B	Southern Xinjiang	Not vaccinated
Negative	2019	male	4	negative	Southern Xinjiang	≥3 dose
Positive	2019	female	4	B	Southern Xinjiang	Not vaccinated
Negative	2019	male	4	negative	Southern Xinjiang	≥3 dose
Positive	2019	female	4	B	Southern Xinjiang	≥3 dose
Negative	2019	male	4	negative	Southern Xinjiang	≥3 dose
Negative	2019	male	4	negative	Southern Xinjiang	Not vaccinated
Negative	2019	female	4	negative	Southern Xinjiang	Not vaccinated
Negative	2019	female	4	negative	Southern Xinjiang	Not vaccinated
Negative	2019	female	5	negative	Southern Xinjiang	Not vaccinated
Negative	2019	male	1	negative	Southern Xinjiang	Not vaccinated
Negative	2019	female	4	negative	Southern Xinjiang	Not vaccinated
Negative	2019	female	1	negative	Southern Xinjiang	2 dose
Negative	2019	male	1	negative	Southern Xinjiang	2 dose
Negative	2019	male	1	negative	Southern Xinjiang	2 dose
Negative	2019	female	1	negative	Southern Xinjiang	2 dose
Positive	2019	male	5	B	Southern Xinjiang	Not vaccinated
Negative	2019	female	2	negative	Southern Xinjiang	≥3 dose
Positive	2019	male	1	Y	Southern Xinjiang	2 dose
Positive	2019	male	1	B	Southern Xinjiang	2 dose
Negative	2019	female	3	negative	Southern Xinjiang	≥3 dose
Negative	2019	female	1	negative	Southern Xinjiang	2 dose
Positive	2019	male	4	C	Southern Xinjiang	Not vaccinated
Negative	2019	male	4	negative	Southern Xinjiang	Not vaccinated
Negative	2019	female	4	negative	Southern Xinjiang	Not vaccinated
Positive	2019	female	4	B	Southern Xinjiang	Not vaccinated
Negative	2019	female	6	negative	Southern Xinjiang	Not vaccinated
Negative	2019	female	6	negative	Southern Xinjiang	Not vaccinated
Positive	2019	male	4	B	Southern Xinjiang	Not vaccinated
Positive	2019	female	5	B	Southern Xinjiang	Not vaccinated
Negative	2019	male	5	negative	Southern Xinjiang	Not vaccinated
Positive	2019	female	5	B	Southern Xinjiang	Not vaccinated
Positive	2019	male	4	B	Southern Xinjiang	≥3 dose
Negative	2019	male	6	negative	Southern Xinjiang	Not vaccinated
Negative	2019	male	6	negative	Southern Xinjiang	Not vaccinated
Negative	2019	male	4	negative	Southern Xinjiang	1 dose
Negative	2019	male	5	negative	Southern Xinjiang	Not vaccinated
Negative	2019	female	6	negative	Southern Xinjiang	Not vaccinated
Positive	2019	male	1	B	Southern Xinjiang	≥3 dose
Negative	2019	male	3	negative	Southern Xinjiang	≥3 dose
Negative	2019	female	3	negative	Southern Xinjiang	Not vaccinated
Negative	2019	female	5	negative	Southern Xinjiang	≥3 dose
Negative	2019	male	4	negative	Southern Xinjiang	≥3 dose
Negative	2019	male	3	negative	Southern Xinjiang	≥3 dose
Negative	2019	female	3	negative	Southern Xinjiang	Not vaccinated
Negative	2019	female	6	negative	Southern Xinjiang	2 dose
Negative	2019	male	1	negative	Southern Xinjiang	Not vaccinated
Negative	2019	female	5	negative	Southern Xinjiang	Not vaccinated
Negative	2019	female	6	negative	Southern Xinjiang	≥3 dose
Negative	2019	male	3	negative	Southern Xinjiang	≥3 dose
Negative	2019	female	2	negative	Southern Xinjiang	≥3 dose
Negative	2019	female	2	negative	Southern Xinjiang	2 dose
Negative	2019	female	1	negative	Southern Xinjiang	≥3 dose
Negative	2019	female	2	negative	Southern Xinjiang	≥3 dose
Negative	2019	female	3	negative	Southern Xinjiang	Not vaccinated
Negative	2019	female	3	negative	Southern Xinjiang	Not vaccinated
Negative	2019	male	6	negative	Southern Xinjiang	≥3 dose
Negative	2019	female	2	negative	Southern Xinjiang	2 dose
Negative	2019	male	1	negative	Southern Xinjiang	2 dose
Negative	2019	female	1	negative	Southern Xinjiang	Not vaccinated
Negative	2019	female	6	negative	Southern Xinjiang	Not vaccinated
Negative	2019	female	5	negative	Southern Xinjiang	≥3 dose
Negative	2019	female	3	negative	Southern Xinjiang	≥3 dose
Negative	2019	female	2	negative	Southern Xinjiang	≥3 dose
Negative	2019	female	2	negative	Southern Xinjiang	Not vaccinated
Negative	2019	female	4	negative	Southern Xinjiang	2 dose
Negative	2019	male	1	negative	Southern Xinjiang	Not vaccinated
Negative	2019	female	4	negative	Southern Xinjiang	1 dose
Negative	2019	female	3	negative	Southern Xinjiang	2 dose
Negative	2019	male	1	negative	Southern Xinjiang	≥3 dose
Negative	2019	male	1	negative	Southern Xinjiang	Not vaccinated
Negative	2019	male	1	negative	Southern Xinjiang	2 dose
Negative	2019	female	1	negative	Southern Xinjiang	≥3 dose
Negative	2019	male	3	negative	Southern Xinjiang	Not vaccinated
Positive	2019	female	3	B	Southern Xinjiang	≥3 dose
Negative	2019	male	3	negative	Southern Xinjiang	≥3 dose
Negative	2019	female	2	negative	Southern Xinjiang	≥3 dose
Negative	2019	female	3	negative	Southern Xinjiang	≥3 dose
Negative	2019	male	3	negative	Southern Xinjiang	≥3 dose
Negative	2019	male	4	negative	Southern Xinjiang	Not vaccinated
Negative	2019	male	5	negative	Southern Xinjiang	Not vaccinated
Negative	2019	female	5	negative	Southern Xinjiang	Not vaccinated
Negative	2019	female	4	negative	Southern Xinjiang	Not vaccinated
Negative	2019	female	5	negative	Southern Xinjiang	≥3 dose
Negative	2019	female	2	negative	Southern Xinjiang	Not vaccinated
Negative	2019	male	5	negative	Southern Xinjiang	Not vaccinated
Negative	2019	female	6	negative	Southern Xinjiang	≥3 dose
Negative	2019	female	3	negative	Southern Xinjiang	≥3 dose
Negative	2019	male	3	negative	Southern Xinjiang	≥3 dose
Positive	2019	male	2	B	Southern Xinjiang	≥3 dose
Negative	2019	female	3	negative	Southern Xinjiang	≥3 dose
Negative	2019	female	2	negative	Southern Xinjiang	≥3 dose
Negative	2019	male	2	negative	Southern Xinjiang	≥3 dose
Negative	2019	female	4	negative	Southern Xinjiang	2 dose
Negative	2019	male	1	negative	Southern Xinjiang	Not vaccinated
Negative	2019	female	6	negative	Southern Xinjiang	2 dose
Negative	2019	male	1	negative	Southern Xinjiang	≥3 dose
Negative	2019	male	3	negative	Southern Xinjiang	≥3 dose
Negative	2019	female	2	negative	Southern Xinjiang	≥3 dose
Positive	2019	male	3	B	Southern Xinjiang	≥3 dose
Negative	2019	male	3	negative	Southern Xinjiang	Not vaccinated
Negative	2019	male	1	negative	Southern Xinjiang	2 dose
Negative	2019	male	1	negative	Southern Xinjiang	≥3 dose
Negative	2019	male	3	negative	Southern Xinjiang	Not vaccinated
Negative	2019	female	5	negative	Southern Xinjiang	Not vaccinated
Negative	2019	female	5	negative	Southern Xinjiang	2 dose
Negative	2019	male	1	negative	Southern Xinjiang	2 dose
Negative	2019	female	1	negative	Southern Xinjiang	2 dose
Negative	2019	female	1	negative	Southern Xinjiang	Not vaccinated
Negative	2019	female	6	negative	Southern Xinjiang	≥3 dose
Negative	2019	female	2	negative	Southern Xinjiang	Not vaccinated
Negative	2019	male	6	negative	Southern Xinjiang	≥3 dose
Negative	2019	male	3	negative	Southern Xinjiang	Not vaccinated
Negative	2019	female	6	negative	Southern Xinjiang	≥3 dose
Negative	2019	male	2	negative	Southern Xinjiang	Not vaccinated
Negative	2019	female	6	negative	Southern Xinjiang	Not vaccinated
Positive	2019	female	6	B	Southern Xinjiang	Not vaccinated
Negative	2019	male	6	negative	Southern Xinjiang	Not vaccinated
Positive	2019	female	6	B	Southern Xinjiang	≥3 dose
Negative	2019	female	1	negative	Southern Xinjiang	≥3 dose
Positive	2019	female	4	B	Southern Xinjiang	≥3 dose
Negative	2019	female	2	negative	Southern Xinjiang	≥3 dose
Negative	2019	female	4	negative	Southern Xinjiang	2 dose
Negative	2019	female	2	negative	Southern Xinjiang	Not vaccinated
Positive	2019	female	6	B	Southern Xinjiang	≥3 dose
Negative	2019	male	1	negative	Southern Xinjiang	Not vaccinated
Negative	2019	male	6	negative	Southern Xinjiang	Not vaccinated
Negative	2019	male	6	negative	Southern Xinjiang	≥3 dose
Positive	2019	female	4	Y	Southern Xinjiang	≥3 dose
Negative	2019	male	2	negative	Southern Xinjiang	≥3 dose
Negative	2019	female	4	negative	Southern Xinjiang	2 dose
Negative	2019	male	1	negative	Southern Xinjiang	2 dose
Negative	2019	male	1	negative	Southern Xinjiang	2 dose
Negative	2019	female	1	negative	Southern Xinjiang	2 dose
Positive	2019	female	1	B	Southern Xinjiang	2 dose
Negative	2019	male	1	negative	Southern Xinjiang	2 dose
Negative	2019	female	1	negative	Southern Xinjiang	2 dose
Negative	2019	male	1	negative	Southern Xinjiang	2 dose
Negative	2019	male	1	negative	Southern Xinjiang	2 dose
Negative	2019	male	1	negative	Southern Xinjiang	2 dose
Negative	2019	male	1	negative	Southern Xinjiang	≥3 dose
Negative	2019	male	1	negative	Southern Xinjiang	≥3 dose
Negative	2019	female	1	negative	Southern Xinjiang	≥3 dose
Negative	2019	female	2	negative	Southern Xinjiang	≥3 dose
Negative	2019	female	2	negative	Southern Xinjiang	≥3 dose
Negative	2019	female	2	negative	Southern Xinjiang	≥3 dose
Positive	2019	male	2	Y	Southern Xinjiang	≥3 dose
Negative	2019	male	2	negative	Southern Xinjiang	≥3 dose
Negative	2019	male	1	negative	Southern Xinjiang	≥3 dose
Negative	2019	male	2	negative	Southern Xinjiang	≥3 dose
Negative	2019	male	2	negative	Southern Xinjiang	≥3 dose
Negative	2019	male	1	negative	Southern Xinjiang	≥3 dose
Negative	2019	male	2	negative	Southern Xinjiang	2 dose
Positive	2019	female	3	B	Southern Xinjiang	≥3 dose
Negative	2019	male	3	negative	Southern Xinjiang	≥3 dose
Negative	2019	male	3	negative	Southern Xinjiang	≥3 dose
Negative	2019	female	3	negative	Southern Xinjiang	≥3 dose
Negative	2019	female	3	negative	Southern Xinjiang	≥3 dose
Negative	2019	female	3	negative	Southern Xinjiang	≥3 dose
Positive	2019	female	3	B	Southern Xinjiang	≥3 dose
Negative	2019	female	3	negative	Southern Xinjiang	≥3 dose
Negative	2019	female	4	negative	Southern Xinjiang	≥3 dose
Negative	2019	female	3	negative	Southern Xinjiang	≥3 dose
Negative	2019	female	4	negative	Southern Xinjiang	≥3 dose
Negative	2019	female	4	negative	Southern Xinjiang	≥3 dose
Negative	2019	female	4	negative	Southern Xinjiang	≥3 dose
Negative	2019	female	4	negative	Southern Xinjiang	≥3 dose
Negative	2019	male	3	negative	Southern Xinjiang	≥3 dose
Positive	2019	male	3	Y	Southern Xinjiang	≥3 dose
Negative	2019	female	3	negative	Southern Xinjiang	≥3 dose
Positive	2019	female	4	Non-genogroup	Southern Xinjiang	Not vaccinated
Negative	2019	male	5	negative	Southern Xinjiang	Not vaccinated
Positive	2019	male	6	B	Southern Xinjiang	Not vaccinated
Negative	2019	female	5	negative	Southern Xinjiang	Not vaccinated
Positive	2019	female	5	B	Southern Xinjiang	Not vaccinated
Negative	2019	female	5	negative	Southern Xinjiang	Not vaccinated
Negative	2019	female	5	negative	Southern Xinjiang	Not vaccinated
Negative	2019	female	5	negative	Southern Xinjiang	Not vaccinated
Negative	2019	female	5	negative	Southern Xinjiang	Not vaccinated
Negative	2019	female	5	negative	Southern Xinjiang	Not vaccinated
Negative	2019	female	5	negative	Southern Xinjiang	Not vaccinated
Negative	2019	female	5	negative	Southern Xinjiang	Not vaccinated
Negative	2019	female	6	negative	Southern Xinjiang	Not vaccinated
Negative	2019	female	6	negative	Southern Xinjiang	Not vaccinated
Negative	2019	female	6	negative	Southern Xinjiang	Not vaccinated
Negative	2019	male	6	negative	Southern Xinjiang	Not vaccinated
Negative	2019	male	6	negative	Southern Xinjiang	Not vaccinated
Negative	2019	female	6	negative	Southern Xinjiang	Not vaccinated
Negative	2019	female	6	negative	Southern Xinjiang	Not vaccinated
Negative	2019	female	6	negative	Southern Xinjiang	Not vaccinated
Negative	2019	female	6	negative	Southern Xinjiang	2 dose
Negative	2019	male	1	negative	Southern Xinjiang	2 dose
Negative	2019	male	3	negative	Southern Xinjiang	2 dose
Negative	2019	female	1	negative	Southern Xinjiang	≥3 dose
Negative	2019	male	3	negative	Southern Xinjiang	≥3 dose
Negative	2019	female	1	negative	Southern Xinjiang	≥3 dose
Positive	2019	female	3	B	Southern Xinjiang	≥3 dose
Negative	2019	female	3	negative	Southern Xinjiang	Not vaccinated
Negative	2019	male	1	negative	Southern Xinjiang	2 dose
Negative	2019	male	3	negative	Southern Xinjiang	2 dose
Negative	2019	female	1	negative	Southern Xinjiang	≥3 dose
Negative	2019	male	2	negative	Southern Xinjiang	Not vaccinated
Negative	2019	female	1	negative	Southern Xinjiang	1 dose
Positive	2019	male	3	X	Southern Xinjiang	Not vaccinated
Negative	2019	female	2	negative	Southern Xinjiang	2 dose
Negative	2019	female	2	negative	Southern Xinjiang	Not vaccinated
Negative	2019	male	1	negative	Southern Xinjiang	2 dose
Positive	2019	female	1	B	Southern Xinjiang	Not vaccinated
Positive	2019	female	4	X	Southern Xinjiang	Not vaccinated
Negative	2019	female	5	negative	Southern Xinjiang	Not vaccinated
Positive	2019	female	5	B	Southern Xinjiang	Not vaccinated
Negative	2019	male	5	negative	Southern Xinjiang	Not vaccinated
Positive	2019	female	4	B	Southern Xinjiang	≥3 dose
Negative	2019	female	1	negative	Southern Xinjiang	Not vaccinated
Positive	2019	male	4	B	Southern Xinjiang	Not vaccinated
Negative	2019	female	6	negative	Southern Xinjiang	Not vaccinated
Negative	2019	male	5	negative	Southern Xinjiang	Not vaccinated
Negative	2019	female	1	negative	Southern Xinjiang	Not vaccinated
Negative	2019	female	6	negative	Southern Xinjiang	Not vaccinated
Positive	2019	male	5	Non-genogroup	Southern Xinjiang	Not vaccinated
Negative	2019	male	5	negative	Southern Xinjiang	Not vaccinated
Negative	2019	male	6	negative	Southern Xinjiang	2 dose
Negative	2019	female	1	negative	Southern Xinjiang	Not vaccinated
Negative	2019	male	6	negative	Southern Xinjiang	Not vaccinated
Negative	2019	male	5	negative	Southern Xinjiang	Not vaccinated
Negative	2019	female	6	negative	Southern Xinjiang	≥3 dose
Negative	2019	male	1	negative	Southern Xinjiang	Not vaccinated
Negative	2019	female	6	negative	Southern Xinjiang	Not vaccinated
Negative	2019	female	6	negative	Southern Xinjiang	Not vaccinated
Negative	2019	female	6	negative	Southern Xinjiang	≥3 dose
Negative	2019	female	3	negative	Southern Xinjiang	≥3 dose
Positive	2019	female	1	Non-genogroup	Southern Xinjiang	Not vaccinated
Negative	2019	female	4	negative	Southern Xinjiang	Not vaccinated
Negative	2019	female	4	negative	Southern Xinjiang	Not vaccinated
Negative	2019	female	3	negative	Southern Xinjiang	Not vaccinated
Negative	2019	female	4	negative	Southern Xinjiang	Not vaccinated
Negative	2019	female	3	negative	Southern Xinjiang	≥3 dose
Positive	2019	female	2	Non-genogroup	Southern Xinjiang	Not vaccinated
Negative	2019	male	2	negative	Southern Xinjiang	Not vaccinated
Negative	2019	female	6	negative	Southern Xinjiang	2 dose
Negative	2019	female	2	negative	Southern Xinjiang	Not vaccinated
Positive	2019	female	2	C	Southern Xinjiang	Not vaccinated
Positive	2019	female	1	C	Southern Xinjiang	Not vaccinated
Negative	2019	female	4	negative	Southern Xinjiang	Not vaccinated
Negative	2019	female	5	negative	Southern Xinjiang	Not vaccinated
Negative	2019	male	4	negative	Southern Xinjiang	Not vaccinated
Positive	2019	male	3	B	Southern Xinjiang	Not vaccinated
Negative	2019	female	3	negative	Southern Xinjiang	2 dose
Negative	2019	male	1	negative	Southern Xinjiang	≥3 dose
Negative	2019	female	1	negative	Southern Xinjiang	≥3 dose
Negative	2019	female	1	negative	Southern Xinjiang	Not vaccinated
Negative	2019	female	4	negative	Southern Xinjiang	Not vaccinated
Negative	2019	female	6	negative	Southern Xinjiang	2 dose
Negative	2019	male	1	negative	Southern Xinjiang	Not vaccinated
Positive	2019	female	6	B	Southern Xinjiang	2 dose
Negative	2019	male	1	negative	Southern Xinjiang	Not vaccinated
Negative	2019	female	6	negative	Southern Xinjiang	2 dose
Negative	2019	female	1	negative	Southern Xinjiang	Not vaccinated
Negative	2019	female	5	negative	Southern Xinjiang	1 dose
Negative	2019	male	1	negative	Southern Xinjiang	Not vaccinated
Negative	2019	female	6	negative	Southern Xinjiang	2 dose
Negative	2019	male	1	negative	Southern Xinjiang	Not vaccinated
Positive	2019	female	6	B	Southern Xinjiang	Not vaccinated
Positive	2019	female	1	B	Southern Xinjiang	Not vaccinated
Negative	2019	female	6	negative	Southern Xinjiang	2 dose
Negative	2019	male	1	negative	Southern Xinjiang	Not vaccinated
Positive	2019	female	6	Non-genogroup	Southern Xinjiang	2 dose
Negative	2019	male	1	negative	Southern Xinjiang	Not vaccinated
Negative	2019	female	6	negative	Southern Xinjiang	2 dose
Negative	2019	male	1	negative	Southern Xinjiang	Not vaccinated
Negative	2019	female	6	negative	Southern Xinjiang	≥3 dose
Positive	2019	female	2	B	Southern Xinjiang	Not vaccinated
Negative	2019	male	3	negative	Southern Xinjiang	≥3 dose
Negative	2019	female	3	negative	Southern Xinjiang	Not vaccinated
Negative	2019	male	3	negative	Southern Xinjiang	≥3 dose
Negative	2019	female	2	negative	Southern Xinjiang	≥3 dose
Negative	2019	male	2	negative	Southern Xinjiang	2 dose
Negative	2019	male	1	negative	Southern Xinjiang	2 dose
Negative	2019	female	2	negative	Southern Xinjiang	≥3 dose
Negative	2019	female	3	negative	Southern Xinjiang	Not vaccinated
Negative	2019	female	3	negative	Southern Xinjiang	2 dose
Negative	2019	female	1	negative	Southern Xinjiang	Not vaccinated
Negative	2019	male	3	negative	Southern Xinjiang	Not vaccinated
Negative	2019	female	3	negative	Southern Xinjiang	2 dose
Negative	2019	female	2	negative	Southern Xinjiang	≥3 dose
Negative	2019	female	2	negative	Southern Xinjiang	≥3 dose
Negative	2019	female	3	negative	Southern Xinjiang	Not vaccinated
Negative	2019	female	4	negative	Southern Xinjiang	Not vaccinated
Negative	2019	female	4	negative	Southern Xinjiang	≥3 dose
Negative	2019	female	2	negative	Southern Xinjiang	Not vaccinated
Negative	2019	female	5	negative	Southern Xinjiang	Not vaccinated
Negative	2019	female	5	negative	Southern Xinjiang	2 dose
Negative	2019	female	2	negative	Southern Xinjiang	Not vaccinated
Negative	2019	female	5	negative	Southern Xinjiang	≥3 dose
Negative	2019	male	2	negative	Southern Xinjiang	≥3 dose
Negative	2019	female	2	negative	Southern Xinjiang	≥3 dose
Negative	2019	male	2	negative	Southern Xinjiang	Not vaccinated
Negative	2019	female	5	negative	Southern Xinjiang	Not vaccinated
Negative	2019	male	5	negative	Southern Xinjiang	Not vaccinated
Negative	2019	female	2	negative	Southern Xinjiang	Not vaccinated
Negative	2019	female	4	negative	Southern Xinjiang	Not vaccinated
Negative	2019	female	4	negative	Southern Xinjiang	Not vaccinated
Positive	2019	male	4	X	Southern Xinjiang	Not vaccinated
Negative	2019	male	4	negative	Southern Xinjiang	Not vaccinated
Negative	2019	male	4	negative	Southern Xinjiang	Not vaccinated
Negative	2019	male	4	negative	Southern Xinjiang	Not vaccinated
Negative	2019	male	4	negative	Southern Xinjiang	Not vaccinated
Negative	2019	male	5	negative	Southern Xinjiang	Not vaccinated
Positive	2019	male	4	X	Southern Xinjiang	Not vaccinated
Negative	2019	male	5	negative	Southern Xinjiang	Not vaccinated
Negative	2019	female	4	negative	Southern Xinjiang	Not vaccinated
Negative	2019	female	5	negative	Southern Xinjiang	Not vaccinated
Negative	2019	male	1	negative	Southern Xinjiang	Not vaccinated
Positive	2019	male	6	B	Southern Xinjiang	Not vaccinated
Negative	2019	female	6	negative	Southern Xinjiang	Not vaccinated
Negative	2019	male	1	negative	Southern Xinjiang	Not vaccinated
Negative	2019	male	6	negative	Southern Xinjiang	2 dose
Negative	2019	male	1	negative	Southern Xinjiang	2 dose
Negative	2019	female	1	negative	Southern Xinjiang	Not vaccinated
Negative	2019	female	6	negative	Southern Xinjiang	Not vaccinated
Negative	2019	female	6	negative	Southern Xinjiang	≥3 dose
Negative	2019	male	2	negative	Southern Xinjiang	Not vaccinated
Negative	2019	female	6	negative	Southern Xinjiang	2 dose
Negative	2019	male	1	negative	Southern Xinjiang	Not vaccinated
Negative	2019	female	6	negative	Southern Xinjiang	2 dose
Negative	2019	male	1	negative	Southern Xinjiang	2 dose
Negative	2019	male	1	negative	Southern Xinjiang	Not vaccinated
Positive	2019	female	6	B	Southern Xinjiang	Not vaccinated
Negative	2019	female	6	negative	Southern Xinjiang	2 dose
Negative	2019	female	1	negative	Southern Xinjiang	≥3 dose
Negative	2019	female	1	negative	Southern Xinjiang	Not vaccinated
Negative	2019	female	6	negative	Southern Xinjiang	≥3 dose
Negative	2019	female	1	negative	Southern Xinjiang	≥3 dose
Negative	2019	female	1	negative	Southern Xinjiang	Not vaccinated
Positive	2019	female	4	Non-genogroup	Southern Xinjiang	≥3 dose
Negative	2019	female	3	negative	Southern Xinjiang	Not vaccinated
Negative	2019	female	3	negative	Southern Xinjiang	1 dose
Negative	2019	male	3	negative	Southern Xinjiang	≥3 dose
Negative	2019	male	3	negative	Southern Xinjiang	≥3 dose
Negative	2019	female	3	negative	Southern Xinjiang	Not vaccinated
Negative	2019	male	3	negative	Southern Xinjiang	≥3 dose
Negative	2019	male	3	negative	Southern Xinjiang	≥3 dose
Positive	2019	male	3	X	Southern Xinjiang	Not vaccinated
Negative	2019	male	3	negative	Southern Xinjiang	≥3 dose
Negative	2019	male	2	negative	Southern Xinjiang	≥3 dose
Negative	2019	male	2	negative	Southern Xinjiang	≥3 dose
Negative	2019	male	3	negative	Southern Xinjiang	≥3 dose
Negative	2019	male	2	negative	Southern Xinjiang	≥3 dose
Negative	2019	male	3	negative	Southern Xinjiang	Not vaccinated
Negative	2019	male	4	negative	Southern Xinjiang	Not vaccinated
Positive	2019	female	4	X	Southern Xinjiang	Not vaccinated
Positive	2019	female	4	Non-genogroup	Southern Xinjiang	≥3 dose
Positive	2019	female	4	B	Southern Xinjiang	≥3 dose
Negative	2019	female	3	negative	Southern Xinjiang	≥3 dose
Negative	2019	female	2	negative	Southern Xinjiang	≥3 dose
Negative	2019	female	2	negative	Southern Xinjiang	≥3 dose
Negative	2019	male	1	negative	Southern Xinjiang	Not vaccinated
Negative	2019	female	4	negative	Southern Xinjiang	≥3 dose
Negative	2019	male	4	negative	Southern Xinjiang	Not vaccinated
Negative	2019	male	3	negative	Southern Xinjiang	Not vaccinated
Negative	2019	male	3	negative	Southern Xinjiang	Not vaccinated
Positive	2019	female	3	Non-genogroup	Southern Xinjiang	Not vaccinated
Negative	2019	female	3	negative	Southern Xinjiang	Not vaccinated
Positive	2019	male	6	B	Southern Xinjiang	Not vaccinated
Positive	2019	male	5	X	Southern Xinjiang	Not vaccinated
Negative	2019	female	6	negative	Southern Xinjiang	Not vaccinated
Negative	2019	male	6	negative	Southern Xinjiang	Not vaccinated
Positive	2019	female	3	B	Southern Xinjiang	Not vaccinated
Negative	2019	female	3	negative	Southern Xinjiang	Not vaccinated
Negative	2019	female	3	negative	Southern Xinjiang	Not vaccinated
Negative	2019	male	6	negative	Southern Xinjiang	Not vaccinated
Positive	2019	male	5	B	Southern Xinjiang	≥3 dose
Negative	2019	male	1	negative	Southern Xinjiang	≥3 dose
Negative	2019	male	2	negative	Southern Xinjiang	≥3 dose
Negative	2019	male	2	negative	Southern Xinjiang	≥3 dose
Negative	2019	female	2	negative	Southern Xinjiang	≥3 dose
Negative	2019	male	2	negative	Southern Xinjiang	≥3 dose
Negative	2019	female	2	negative	Southern Xinjiang	≥3 dose
Negative	2019	female	2	negative	Southern Xinjiang	≥3 dose
Negative	2019	male	2	negative	Southern Xinjiang	≥3 dose
Negative	2019	male	2	negative	Southern Xinjiang	≥3 dose
Negative	2019	male	1	negative	Southern Xinjiang	≥3 dose
Negative	2019	male	3	negative	Southern Xinjiang	2 dose
Negative	2019	female	3	negative	Southern Xinjiang	≥3 dose
Negative	2019	male	3	negative	Southern Xinjiang	2 dose
Negative	2019	female	3	negative	Southern Xinjiang	≥3 dose
Negative	2019	female	3	negative	Southern Xinjiang	≥3 dose
Negative	2019	female	3	negative	Southern Xinjiang	Not vaccinated
Negative	2019	male	3	negative	Southern Xinjiang	≥3 dose
Negative	2019	female	3	negative	Southern Xinjiang	≥3 dose
Negative	2019	female	3	negative	Southern Xinjiang	≥3 dose
Negative	2019	female	4	negative	Southern Xinjiang	Not vaccinated
Negative	2019	female	4	negative	Southern Xinjiang	1 dose
Negative	2019	female	4	negative	Southern Xinjiang	≥3 dose
Negative	2019	male	4	negative	Southern Xinjiang	≥3 dose
Negative	2019	female	3	negative	Southern Xinjiang	≥3 dose
Negative	2019	female	4	negative	Southern Xinjiang	Not vaccinated
Negative	2019	male	3	negative	Southern Xinjiang	≥3 dose
Negative	2019	male	4	negative	Southern Xinjiang	Not vaccinated
Negative	2019	male	4	negative	Southern Xinjiang	1 dose
Negative	2019	male	4	negative	Southern Xinjiang	≥3 dose
Negative	2019	female	6	negative	Southern Xinjiang	Not vaccinated
Negative	2019	female	6	negative	Southern Xinjiang	Not vaccinated
Negative	2019	male	6	negative	Southern Xinjiang	Not vaccinated
Negative	2019	male	6	negative	Southern Xinjiang	Not vaccinated
Negative	2019	female	6	negative	Southern Xinjiang	Not vaccinated
Negative	2019	male	6	negative	Southern Xinjiang	Not vaccinated
Negative	2019	female	6	negative	Southern Xinjiang	Not vaccinated
Negative	2019	male	6	negative	Southern Xinjiang	Not vaccinated
Negative	2019	female	6	negative	Southern Xinjiang	Not vaccinated
Negative	2019	female	6	negative	Southern Xinjiang	Not vaccinated
Negative	2019	female	1	negative	Southern Xinjiang	1 dose
Negative	2019	male	1	negative	Southern Xinjiang	2 dose
Negative	2019	male	1	negative	Southern Xinjiang	≥3 dose
Negative	2019	female	1	negative	Southern Xinjiang	2 dose
Negative	2019	male	1	negative	Southern Xinjiang	2 dose
Negative	2019	female	1	negative	Southern Xinjiang	2 dose
Negative	2019	female	1	negative	Southern Xinjiang	2 dose
Negative	2019	male	1	negative	Southern Xinjiang	2 dose
Negative	2019	female	1	negative	Southern Xinjiang	2 dose
Negative	2019	male	2	negative	Southern Xinjiang	2 dose
Negative	2019	male	3	negative	Southern Xinjiang	≥3 dose
Negative	2019	female	2	negative	Southern Xinjiang	≥3 dose
Negative	2019	female	1	negative	Southern Xinjiang	≥3 dose
Negative	2019	female	3	negative	Southern Xinjiang	Not vaccinated
Negative	2019	female	2	negative	Southern Xinjiang	≥3 dose
Negative	2019	male	3	negative	Southern Xinjiang	≥3 dose
Negative	2019	female	3	negative	Southern Xinjiang	Not vaccinated
Negative	2019	female	3	negative	Southern Xinjiang	≥3 dose
Negative	2019	female	3	negative	Southern Xinjiang	≥3 dose
Negative	2019	male	3	negative	Southern Xinjiang	Not vaccinated
Negative	2019	male	2	negative	Southern Xinjiang	≥3 dose
Negative	2019	female	1	negative	Southern Xinjiang	2 dose
Negative	2019	female	2	negative	Southern Xinjiang	2 dose
Negative	2019	female	1	negative	Southern Xinjiang	≥3 dose
Negative	2019	female	2	negative	Southern Xinjiang	2 dose
Negative	2019	male	2	negative	Southern Xinjiang	≥3 dose
Negative	2019	male	2	negative	Southern Xinjiang	≥3 dose
Negative	2019	male	2	negative	Southern Xinjiang	≥3 dose
Negative	2019	female	2	negative	Southern Xinjiang	≥3 dose
Negative	2019	female	2	negative	Southern Xinjiang	≥3 dose
Negative	2019	female	3	negative	Southern Xinjiang	Not vaccinated
Negative	2019	male	2	negative	Southern Xinjiang	Not vaccinated
Negative	2019	female	1	negative	Southern Xinjiang	2 dose
Negative	2019	female	2	negative	Southern Xinjiang	Not vaccinated
Negative	2019	female	5	negative	Southern Xinjiang	Not vaccinated
Negative	2019	female	5	negative	Southern Xinjiang	Not vaccinated
Negative	2019	female	4	negative	Southern Xinjiang	Not vaccinated
Negative	2019	female	5	negative	Southern Xinjiang	Not vaccinated
Negative	2019	female	5	negative	Southern Xinjiang	Not vaccinated
Negative	2019	female	6	negative	Southern Xinjiang	Not vaccinated
Negative	2019	female	6	negative	Southern Xinjiang	Not vaccinated
Negative	2019	female	5	negative	Southern Xinjiang	Not vaccinated
Negative	2019	female	6	negative	Southern Xinjiang	Not vaccinated
Negative	2019	female	6	negative	Southern Xinjiang	Not vaccinated
Negative	2019	female	6	negative	Southern Xinjiang	Not vaccinated
Negative	2019	female	6	negative	Southern Xinjiang	Not vaccinated
Negative	2019	female	6	negative	Southern Xinjiang	Not vaccinated
Negative	2019	female	6	negative	Southern Xinjiang	Not vaccinated
Negative	2019	female	5	negative	Southern Xinjiang	Not vaccinated
Negative	2019	female	2	negative	Southern Xinjiang	Not vaccinated
Negative	2019	male	1	negative	Southern Xinjiang	Not vaccinated
Negative	2019	female	1	negative	Southern Xinjiang	Not vaccinated
Negative	2019	female	1	negative	Southern Xinjiang	Not vaccinated
Negative	2019	female	2	negative	Southern Xinjiang	2 dose
Negative	2019	male	1	negative	Southern Xinjiang	2 dose
Negative	2019	male	3	negative	Southern Xinjiang	≥3 dose
Negative	2019	female	1	negative	Southern Xinjiang	≥3 dose
Negative	2019	female	3	negative	Southern Xinjiang	≥3 dose
Negative	2019	male	1	negative	Southern Xinjiang	Not vaccinated
Negative	2019	male	2	negative	Southern Xinjiang	≥3 dose
Negative	2019	male	1	negative	Southern Xinjiang	2 dose
Negative	2019	female	5	negative	Southern Xinjiang	Not vaccinated
Negative	2019	male	1	negative	Southern Xinjiang	1 dose
Negative	2019	female	3	negative	Southern Xinjiang	2 dose
Negative	2019	female	3	negative	Southern Xinjiang	1 dose
Negative	2019	female	3	negative	Southern Xinjiang	≥3 dose
Positive	2019	male	3	C	Southern Xinjiang	Not vaccinated
Negative	2019	male	5	negative	Southern Xinjiang	Not vaccinated
Negative	2019	male	5	negative	Southern Xinjiang	Not vaccinated
Negative	2019	female	5	negative	Southern Xinjiang	Not vaccinated
Negative	2019	female	5	negative	Southern Xinjiang	Not vaccinated
Positive	2019	female	5	C	Southern Xinjiang	Not vaccinated
Positive	2019	male	5	C	Southern Xinjiang	Not vaccinated
Positive	2019	male	5	C	Southern Xinjiang	Not vaccinated
Negative	2019	female	1	negative	Southern Xinjiang	Not vaccinated
Negative	2019	female	5	negative	Southern Xinjiang	Not vaccinated
Negative	2019	female	5	negative	Southern Xinjiang	Not vaccinated
Negative	2019	female	5	negative	Southern Xinjiang	Not vaccinated
Negative	2019	female	4	negative	Southern Xinjiang	Not vaccinated
Negative	2019	female	5	negative	Southern Xinjiang	Not vaccinated
Negative	2019	female	5	negative	Southern Xinjiang	Not vaccinated
Negative	2019	female	1	negative	Southern Xinjiang	Not vaccinated
Negative	2019	female	2	negative	Southern Xinjiang	Not vaccinated
Negative	2019	male	6	negative	Southern Xinjiang	Not vaccinated
Negative	2019	female	6	negative	Southern Xinjiang	Not vaccinated
Negative	2019	female	6	negative	Southern Xinjiang	Not vaccinated
Negative	2019	female	6	negative	Southern Xinjiang	Not vaccinated
Negative	2019	female	6	negative	Southern Xinjiang	Not vaccinated
Negative	2019	female	6	negative	Southern Xinjiang	Not vaccinated
Negative	2019	female	6	negative	Southern Xinjiang	Not vaccinated
Negative	2019	female	6	negative	Southern Xinjiang	Not vaccinated
Negative	2019	female	6	negative	Southern Xinjiang	Not vaccinated
Negative	2019	female	6	negative	Southern Xinjiang	Not vaccinated
Negative	2019	male	3	negative	Southern Xinjiang	Not vaccinated
Negative	2019	male	3	negative	Southern Xinjiang	Not vaccinated
Negative	2019	female	3	negative	Southern Xinjiang	Not vaccinated
Negative	2019	female	3	negative	Southern Xinjiang	Not vaccinated
Negative	2019	female	3	negative	Southern Xinjiang	Not vaccinated
Positive	2019	male	4	C	Southern Xinjiang	Not vaccinated
Negative	2019	male	3	negative	Southern Xinjiang	Not vaccinated
Negative	2019	male	4	negative	Southern Xinjiang	Not vaccinated
Negative	2019	male	4	negative	Southern Xinjiang	Not vaccinated
Negative	2019	male	4	negative	Southern Xinjiang	Not vaccinated
Negative	2019	male	4	negative	Southern Xinjiang	Not vaccinated
Negative	2019	male	3	negative	Southern Xinjiang	Not vaccinated
Negative	2019	male	4	negative	Southern Xinjiang	Not vaccinated
Negative	2019	male	4	negative	Southern Xinjiang	Not vaccinated
Positive	2019	female	3	C	Southern Xinjiang	Not vaccinated
Negative	2019	female	3	negative	Southern Xinjiang	Not vaccinated
Positive	2019	male	2	C	Southern Xinjiang	Not vaccinated
Negative	2019	male	5	negative	Southern Xinjiang	Not vaccinated
Negative	2019	male	5	negative	Southern Xinjiang	Not vaccinated
Positive	2019	male	5	C	Southern Xinjiang	Not vaccinated
Negative	2019	female	5	negative	Southern Xinjiang	Not vaccinated
Negative	2019	female	3	negative	Southern Xinjiang	Not vaccinated
Positive	2019	male	5	C	Southern Xinjiang	Not vaccinated
Negative	2019	male	4	negative	Southern Xinjiang	Not vaccinated
Negative	2016	male	4	negative	Southern Xinjiang	≥3 dose
Negative	2016	male	4	negative	Southern Xinjiang	≥3 dose
Negative	2016	male	4	negative	Southern Xinjiang	≥3 dose
Negative	2016	female	4	negative	Southern Xinjiang	≥3 dose
Negative	2016	male	4	negative	Southern Xinjiang	≥3 dose
Negative	2016	female	4	negative	Southern Xinjiang	≥3 dose
Negative	2016	male	4	negative	Southern Xinjiang	≥3 dose
Positive	2016	female	4	B	Southern Xinjiang	≥3 dose
Negative	2016	male	4	negative	Southern Xinjiang	≥3 dose
Negative	2016	female	4	negative	Southern Xinjiang	≥3 dose
Negative	2016	male	4	negative	Southern Xinjiang	≥3 dose
Positive	2016	female	4	B	Southern Xinjiang	≥3 dose
Negative	2016	male	4	negative	Southern Xinjiang	≥3 dose
Negative	2016	female	4	negative	Southern Xinjiang	≥3 dose
Negative	2016	male	4	negative	Southern Xinjiang	≥3 dose
Negative	2016	female	4	negative	Southern Xinjiang	≥3 dose
Negative	2016	male	4	negative	Southern Xinjiang	≥3 dose
Negative	2016	female	4	negative	Southern Xinjiang	≥3 dose
Negative	2016	male	4	negative	Southern Xinjiang	≥3 dose
Negative	2016	female	4	negative	Southern Xinjiang	≥3 dose
Negative	2016	male	4	negative	Southern Xinjiang	≥3 dose
Negative	2016	female	4	negative	Southern Xinjiang	≥3 dose
Positive	2016	male	4	B	Southern Xinjiang	≥3 dose
Negative	2016	female	4	negative	Southern Xinjiang	≥3 dose
Negative	2016	male	4	negative	Southern Xinjiang	≥3 dose
Positive	2016	female	4	Non-genogroup	Southern Xinjiang	≥3 dose
Negative	2016	male	4	negative	Southern Xinjiang	≥3 dose
Positive	2016	female	4	B	Southern Xinjiang	≥3 dose
Negative	2016	male	4	negative	Southern Xinjiang	≥3 dose
Negative	2016	female	4	negative	Southern Xinjiang	≥3 dose
Positive	2016	male	4	Non-genogroup	Southern Xinjiang	Not quite clear
Negative	2016	female	4	negative	Southern Xinjiang	≥3 dose
Negative	2016	male	4	negative	Southern Xinjiang	Not quite clear
Negative	2016	female	4	negative	Southern Xinjiang	≥3 dose
Negative	2016	male	4	negative	Southern Xinjiang	≥3 dose
Negative	2016	female	4	negative	Southern Xinjiang	≥3 dose
Negative	2016	male	4	negative	Southern Xinjiang	≥3 dose
Positive	2016	female	4	Y	Southern Xinjiang	≥3 dose
Negative	2016	female	4	negative	Southern Xinjiang	≥3 dose
Negative	2016	female	4	negative	Southern Xinjiang	≥3 dose
Negative	2016	male	3	negative	Southern Xinjiang	2 dose
Negative	2016	female	3	negative	Southern Xinjiang	2 dose
Negative	2016	female	3	negative	Southern Xinjiang	2 dose
Negative	2016	female	3	negative	Southern Xinjiang	2 dose
Negative	2016	female	3	negative	Southern Xinjiang	2 dose
Positive	2016	female	3	B	Southern Xinjiang	2 dose
Negative	2016	male	3	negative	Southern Xinjiang	2 dose
Positive	2016	female	3	C	Southern Xinjiang	2 dose
Negative	2016	male	3	negative	Southern Xinjiang	2 dose
Negative	2016	female	3	negative	Southern Xinjiang	2 dose
Positive	2016	male	3	B	Southern Xinjiang	2 dose
Negative	2016	female	3	negative	Southern Xinjiang	2 dose
Negative	2016	male	3	negative	Southern Xinjiang	2 dose
Negative	2016	female	3	negative	Southern Xinjiang	2 dose
Negative	2016	male	3	negative	Southern Xinjiang	2 dose
Negative	2016	female	3	negative	Southern Xinjiang	2 dose
Negative	2016	male	3	negative	Southern Xinjiang	2 dose
Negative	2016	female	3	negative	Southern Xinjiang	2 dose
Negative	2016	male	3	negative	Southern Xinjiang	2 dose
Negative	2016	female	3	negative	Southern Xinjiang	≥3 dose
Positive	2016	male	3	B	Southern Xinjiang	≥3 dose
Negative	2016	female	3	negative	Southern Xinjiang	≥3 dose
Negative	2016	male	3	negative	Southern Xinjiang	≥3 dose
Negative	2016	female	3	negative	Southern Xinjiang	≥3 dose
Negative	2016	male	3	negative	Southern Xinjiang	≥3 dose
Positive	2016	female	3	B	Southern Xinjiang	≥3 dose
Negative	2016	male	3	negative	Southern Xinjiang	≥3 dose
Negative	2016	female	3	negative	Southern Xinjiang	≥3 dose
Negative	2016	male	3	negative	Southern Xinjiang	≥3 dose
Negative	2016	female	3	negative	Southern Xinjiang	≥3 dose
Negative	2016	female	3	negative	Southern Xinjiang	≥3 dose
Negative	2016	male	3	negative	Southern Xinjiang	≥3 dose
Negative	2016	female	3	negative	Southern Xinjiang	≥3 dose
Negative	2016	male	3	negative	Southern Xinjiang	≥3 dose
Negative	2016	female	3	negative	Southern Xinjiang	≥3 dose
Negative	2016	female	3	negative	Southern Xinjiang	≥3 dose
Negative	2016	male	3	negative	Southern Xinjiang	≥3 dose
Negative	2016	female	3	negative	Southern Xinjiang	≥3 dose
Negative	2016	female	3	negative	Southern Xinjiang	≥3 dose
Negative	2016	female	3	negative	Southern Xinjiang	≥3 dose
Negative	2016	female	3	negative	Southern Xinjiang	≥3 dose
Negative	2016	female	3	negative	Southern Xinjiang	≥3 dose
Negative	2016	female	3	negative	Southern Xinjiang	≥3 dose
Negative	2016	female	3	negative	Southern Xinjiang	≥3 dose
Negative	2016	male	3	negative	Southern Xinjiang	≥3 dose
Negative	2016	male	6	negative	Southern Xinjiang	Not quite clear
Positive	2016	male	6	B	Southern Xinjiang	Not quite clear
Negative	2016	male	6	negative	Southern Xinjiang	Not quite clear
Negative	2016	male	6	negative	Southern Xinjiang	Not quite clear
Negative	2016	male	6	negative	Southern Xinjiang	Not quite clear
Negative	2016	male	6	negative	Southern Xinjiang	Not quite clear
Negative	2016	female	6	negative	Southern Xinjiang	Not quite clear
Positive	2016	male	5	C	Southern Xinjiang	Not quite clear
Positive	2016	female	4	C	Southern Xinjiang	Not quite clear
Negative	2016	female	4	negative	Southern Xinjiang	Not quite clear
Negative	2016	female	4	negative	Southern Xinjiang	Not quite clear
Positive	2016	female	5	B	Southern Xinjiang	Not quite clear
Positive	2016	male	5	C	Southern Xinjiang	Not quite clear
Positive	2016	male	5	C	Southern Xinjiang	Not quite clear
Negative	2016	female	5	negative	Southern Xinjiang	Not quite clear
Negative	2016	female	5	negative	Southern Xinjiang	Not quite clear
Negative	2016	female	5	negative	Southern Xinjiang	Not quite clear
Negative	2016	female	5	negative	Southern Xinjiang	Not quite clear
Negative	2016	male	5	negative	Southern Xinjiang	Not quite clear
Positive	2016	female	4	C	Southern Xinjiang	Not quite clear
Negative	2016	male	5	negative	Southern Xinjiang	Not quite clear
Positive	2016	female	6	Y	Southern Xinjiang	Not quite clear
Negative	2016	male	2	negative	Southern Xinjiang	≥3 dose
Positive	2016	female	1	Y	Southern Xinjiang	1 dose
Negative	2016	female	6	negative	Southern Xinjiang	Not vaccinated
Negative	2016	male	1	negative	Southern Xinjiang	1 dose
Negative	2016	male	1	negative	Southern Xinjiang	≥3 dose
Negative	2016	female	2	negative	Southern Xinjiang	1 dose
Negative	2016	female	6	negative	Southern Xinjiang	Not vaccinated
Negative	2016	male	1	negative	Southern Xinjiang	≥3 dose
Negative	2016	female	2	negative	Southern Xinjiang	≥3 dose
Negative	2016	female	6	negative	Southern Xinjiang	Not quite clear
Negative	2016	male	1	negative	Southern Xinjiang	≥3 dose
Negative	2016	female	6	negative	Southern Xinjiang	Not quite clear
Negative	2016	female	1	negative	Southern Xinjiang	1 dose
Negative	2016	female	6	negative	Southern Xinjiang	Not quite clear
Negative	2016	female	2	negative	Southern Xinjiang	≥3 dose
Negative	2016	female	6	negative	Southern Xinjiang	Not vaccinated
Negative	2016	female	6	negative	Southern Xinjiang	Not quite clear
Negative	2016	female	6	negative	Southern Xinjiang	Not quite clear
Negative	2016	female	1	negative	Southern Xinjiang	1 dose
Positive	2016	male	6	X	Southern Xinjiang	Not quite clear
Positive	2016	female	6	B	Southern Xinjiang	Not vaccinated
Negative	2016	female	6	negative	Southern Xinjiang	Not quite clear
Negative	2016	female	1	negative	Southern Xinjiang	≥3 dose
Negative	2016	male	1	negative	Southern Xinjiang	1 dose
Negative	2016	female	6	negative	Southern Xinjiang	Not quite clear
Negative	2016	female	1	negative	Southern Xinjiang	≥3 dose
Negative	2016	female	1	negative	Southern Xinjiang	≥3 dose
Negative	2016	female	6	negative	Southern Xinjiang	Not quite clear
Negative	2016	female	6	negative	Southern Xinjiang	Not quite clear
Negative	2016	female	6	negative	Southern Xinjiang	Not quite clear
Negative	2016	female	1	negative	Southern Xinjiang	1 dose
Negative	2016	female	6	negative	Southern Xinjiang	Not quite clear
Negative	2016	female	6	negative	Southern Xinjiang	Not quite clear
Negative	2016	male	1	negative	Southern Xinjiang	1 dose
Negative	2016	male	6	negative	Southern Xinjiang	Not quite clear
Negative	2016	female	1	negative	Southern Xinjiang	1 dose
Negative	2016	female	6	negative	Southern Xinjiang	Not quite clear
Negative	2016	male	1	negative	Southern Xinjiang	1 dose
Negative	2016	male	6	negative	Southern Xinjiang	Not quite clear
Positive	2016	male	1	Non-genogroup	Southern Xinjiang	1 dose
Negative	2016	male	6	negative	Southern Xinjiang	Not quite clear
Negative	2016	male	1	negative	Southern Xinjiang	1 dose
Negative	2016	male	1	negative	Southern Xinjiang	1 dose
Negative	2016	female	6	negative	Southern Xinjiang	Not quite clear
Negative	2016	female	1	negative	Southern Xinjiang	1 dose
Negative	2016	female	1	negative	Southern Xinjiang	1 dose
Negative	2016	female	1	negative	Southern Xinjiang	≥3 dose
Negative	2016	female	1	negative	Southern Xinjiang	≥3 dose
Negative	2016	male	1	negative	Southern Xinjiang	1 dose
Negative	2016	male	1	negative	Southern Xinjiang	1 dose
Negative	2016	female	6	negative	Southern Xinjiang	Not quite clear
Negative	2016	female	1	negative	Southern Xinjiang	1 dose
Negative	2016	female	6	negative	Southern Xinjiang	Not quite clear
Negative	2016	female	2	negative	Southern Xinjiang	≥3 dose
Positive	2016	female	6	B	Southern Xinjiang	Not quite clear
Negative	2016	female	6	negative	Southern Xinjiang	Not quite clear
Positive	2016	female	6	B	Southern Xinjiang	Not quite clear
Negative	2016	male	1	negative	Southern Xinjiang	1 dose
Negative	2016	female	6	negative	Southern Xinjiang	Not quite clear
Negative	2016	male	1	negative	Southern Xinjiang	≥3 dose
Negative	2016	male	1	negative	Southern Xinjiang	1 dose
Negative	2016	female	6	negative	Southern Xinjiang	Not quite clear
Negative	2016	male	1	negative	Southern Xinjiang	1 dose
Negative	2016	female	2	negative	Southern Xinjiang	≥3 dose
Negative	2016	male	1	negative	Southern Xinjiang	1 dose
Negative	2016	female	6	negative	Southern Xinjiang	Not quite clear
Negative	2016	female	6	negative	Southern Xinjiang	Not quite clear
Negative	2016	female	1	negative	Southern Xinjiang	1 dose
Negative	2016	male	2	negative	Southern Xinjiang	≥3 dose
Positive	2016	female	1	B	Southern Xinjiang	1 dose
Negative	2016	female	1	negative	Southern Xinjiang	1 dose
Negative	2016	male	1	negative	Southern Xinjiang	1 dose
Negative	2016	female	1	negative	Southern Xinjiang	1 dose
Negative	2016	female	1	negative	Southern Xinjiang	≥3 dose
Negative	2016	female	2	negative	Southern Xinjiang	≥3 dose
Negative	2016	female	1	negative	Southern Xinjiang	1 dose
Negative	2016	male	1	negative	Southern Xinjiang	1 dose
Negative	2016	male	1	negative	Southern Xinjiang	1 dose
Negative	2016	male	1	negative	Southern Xinjiang	1 dose
Negative	2016	male	2	negative	Southern Xinjiang	≥3 dose
Negative	2016	male	1	negative	Southern Xinjiang	1 dose
Negative	2016	female	1	negative	Southern Xinjiang	1 dose
Negative	2016	male	2	negative	Southern Xinjiang	Not quite clear
Negative	2016	male	2	negative	Southern Xinjiang	Not quite clear
Negative	2016	male	2	negative	Southern Xinjiang	Not quite clear
Negative	2016	female	2	negative	Southern Xinjiang	≥3 dose
Negative	2016	male	2	negative	Southern Xinjiang	≥3 dose
Negative	2016	female	2	negative	Southern Xinjiang	≥3 dose
Negative	2016	male	2	negative	Southern Xinjiang	Not quite clear
Negative	2016	male	5	negative	Southern Xinjiang	Not quite clear
Negative	2016	male	5	negative	Southern Xinjiang	Not quite clear
Negative	2016	male	2	negative	Southern Xinjiang	≥3 dose
Negative	2016	male	2	negative	Southern Xinjiang	≥3 dose
Negative	2016	male	2	negative	Southern Xinjiang	≥3 dose
Negative	2016	male	2	negative	Southern Xinjiang	≥3 dose
Negative	2016	female	2	negative	Southern Xinjiang	≥3 dose
Negative	2016	female	2	negative	Southern Xinjiang	≥3 dose
Positive	2016	female	2	Y	Southern Xinjiang	≥3 dose
Negative	2016	male	2	negative	Southern Xinjiang	≥3 dose
Negative	2016	female	1	negative	Southern Xinjiang	1 dose
Negative	2016	male	2	negative	Southern Xinjiang	≥3 dose
Negative	2016	male	2	negative	Southern Xinjiang	≥3 dose
Negative	2016	female	2	negative	Southern Xinjiang	≥3 dose
Negative	2016	female	2	negative	Southern Xinjiang	Not quite clear
Negative	2016	female	2	negative	Southern Xinjiang	Not quite clear
Negative	2016	female	2	negative	Southern Xinjiang	Not quite clear
Negative	2016	male	2	negative	Southern Xinjiang	Not quite clear
Negative	2016	male	2	negative	Southern Xinjiang	Not quite clear
Positive	2016	male	2	C	Southern Xinjiang	Not quite clear
Negative	2016	female	1	negative	Southern Xinjiang	1 dose
Negative	2016	male	1	negative	Southern Xinjiang	1 dose
Negative	2016	female	4	negative	Southern Xinjiang	Not quite clear
Negative	2016	female	5	negative	Southern Xinjiang	Not quite clear
Negative	2016	female	5	negative	Southern Xinjiang	Not quite clear
Negative	2016	female	5	negative	Southern Xinjiang	Not quite clear
Negative	2016	male	5	negative	Southern Xinjiang	Not quite clear
Negative	2016	male	5	negative	Southern Xinjiang	Not quite clear
Negative	2016	male	5	negative	Southern Xinjiang	Not quite clear
Negative	2016	male	5	negative	Southern Xinjiang	Not quite clear
Positive	2016	male	5	Non-genogroup	Southern Xinjiang	Not quite clear
Negative	2016	male	5	negative	Southern Xinjiang	Not quite clear
Negative	2016	male	5	negative	Southern Xinjiang	Not quite clear
Negative	2016	male	5	negative	Southern Xinjiang	Not quite clear
Negative	2016	male	5	negative	Southern Xinjiang	Not quite clear
Negative	2016	male	4	negative	Southern Xinjiang	Not quite clear
Negative	2016	male	4	negative	Southern Xinjiang	Not quite clear
Positive	2016	male	5	B	Southern Xinjiang	Not quite clear
Negative	2016	male	5	negative	Southern Xinjiang	Not quite clear
Negative	2016	male	5	negative	Southern Xinjiang	Not quite clear
Negative	2016	female	4	negative	Southern Xinjiang	Not quite clear
Negative	2016	female	4	negative	Southern Xinjiang	Not quite clear
Negative	2016	female	4	negative	Southern Xinjiang	Not quite clear
Negative	2016	female	4	negative	Southern Xinjiang	Not quite clear
Negative	2016	female	4	negative	Southern Xinjiang	Not quite clear
Negative	2016	female	4	negative	Southern Xinjiang	Not quite clear
Negative	2016	male	2	negative	Southern Xinjiang	≥3 dose
Negative	2016	female	6	negative	Southern Xinjiang	Not quite clear
Negative	2016	male	1	negative	Southern Xinjiang	1 dose
Negative	2016	male	1	negative	Southern Xinjiang	≥3 dose
Negative	2016	female	6	negative	Southern Xinjiang	Not quite clear
Negative	2016	female	1	negative	Southern Xinjiang	1 dose
Negative	2016	male	1	negative	Southern Xinjiang	≥3 dose
Negative	2016	female	1	negative	Southern Xinjiang	1 dose
Negative	2018	female	5	negative	Southern Xinjiang	Not quite clear
Positive	2018	female	5	B	Southern Xinjiang	Not quite clear
Positive	2018	female	5	B	Southern Xinjiang	Not quite clear
Positive	2018	female	5	Non-genogroup	Southern Xinjiang	Not quite clear
Negative	2018	female	5	negative	Southern Xinjiang	Not quite clear
Negative	2018	female	5	negative	Southern Xinjiang	Not quite clear
Negative	2018	male	5	negative	Southern Xinjiang	Not quite clear
Negative	2018	male	5	negative	Southern Xinjiang	Not quite clear
Negative	2018	male	5	negative	Southern Xinjiang	Not quite clear
Positive	2018	male	5	B	Southern Xinjiang	Not quite clear
Negative	2018	female	5	negative	Southern Xinjiang	Not quite clear
Positive	2018	female	5	Non-genogroup	Southern Xinjiang	Not quite clear
Positive	2018	female	5	Non-genogroup	Southern Xinjiang	Not quite clear
Positive	2018	female	5	B	Southern Xinjiang	Not quite clear
Positive	2018	female	5	Y	Southern Xinjiang	Not quite clear
Negative	2018	female	5	negative	Southern Xinjiang	Not quite clear
Positive	2018	female	5	Y	Southern Xinjiang	Not quite clear
Negative	2018	female	5	negative	Southern Xinjiang	Not quite clear
Negative	2018	male	5	negative	Southern Xinjiang	Not quite clear
Negative	2018	male	5	negative	Southern Xinjiang	Not quite clear
Positive	2018	male	5	B	Southern Xinjiang	Not quite clear
Positive	2018	male	5	Non-genogroup	Southern Xinjiang	Not quite clear
Positive	2018	male	5	Non-genogroup	Southern Xinjiang	Not quite clear
Positive	2018	male	5	Non-genogroup	Southern Xinjiang	Not quite clear
Positive	2018	male	5	B	Southern Xinjiang	Not quite clear
Negative	2018	male	5	negative	Southern Xinjiang	Not quite clear
Positive	2018	male	5	B	Southern Xinjiang	Not quite clear
Positive	2018	female	5	Non-genogroup	Southern Xinjiang	Not quite clear
Positive	2018	female	5	Non-genogroup	Southern Xinjiang	Not quite clear
Positive	2018	female	5	Non-genogroup	Southern Xinjiang	Not quite clear
Negative	2018	female	5	negative	Southern Xinjiang	Not quite clear
Negative	2018	female	5	negative	Southern Xinjiang	Not quite clear
Positive	2018	female	3	Non-genogroup	Southern Xinjiang	Not quite clear
Negative	2018	female	5	negative	Southern Xinjiang	Not quite clear
Positive	2018	male	5	B	Southern Xinjiang	Not quite clear
Negative	2018	male	5	negative	Southern Xinjiang	Not quite clear
Negative	2018	female	5	negative	Southern Xinjiang	Not quite clear
Positive	2018	male	5	B	Southern Xinjiang	Not quite clear
Negative	2018	male	5	negative	Southern Xinjiang	Not quite clear
Positive	2018	male	5	Non-genogroup	Southern Xinjiang	Not quite clear
Positive	2018	female	5	B	Southern Xinjiang	Not quite clear
Negative	2018	female	5	negative	Southern Xinjiang	Not quite clear
Positive	2018	male	5	B	Southern Xinjiang	Not quite clear
Positive	2018	male	5	X	Southern Xinjiang	Not quite clear
Negative	2018	male	5	negative	Southern Xinjiang	Not quite clear
Positive	2018	male	5	B	Southern Xinjiang	Not quite clear
Negative	2018	female	5	negative	Southern Xinjiang	Not quite clear
Positive	2018	female	5	B	Southern Xinjiang	Not quite clear
Positive	2018	male	5	Non-genogroup	Southern Xinjiang	Not quite clear
Negative	2018	male	5	negative	Southern Xinjiang	Not quite clear
Negative	2018	male	5	negative	Southern Xinjiang	Not quite clear
Positive	2018	male	5	Non-genogroup	Southern Xinjiang	Not quite clear
Positive	2018	male	5	Non-genogroup	Southern Xinjiang	Not quite clear
Negative	2018	female	4	negative	Southern Xinjiang	Not quite clear
Negative	2018	female	4	negative	Southern Xinjiang	Not quite clear
Negative	2018	female	3	negative	Southern Xinjiang	Not quite clear
Negative	2018	female	4	negative	Southern Xinjiang	Not quite clear
Negative	2018	female	4	negative	Southern Xinjiang	Not quite clear
Negative	2018	female	4	negative	Southern Xinjiang	Not quite clear
Negative	2018	male	4	negative	Southern Xinjiang	Not quite clear
Negative	2018	female	4	negative	Southern Xinjiang	Not quite clear
Negative	2018	female	4	negative	Southern Xinjiang	Not quite clear
Negative	2018	male	4	negative	Southern Xinjiang	Not quite clear
Negative	2018	male	4	negative	Southern Xinjiang	Not quite clear
Negative	2018	male	4	negative	Southern Xinjiang	Not quite clear
Negative	2018	male	4	negative	Southern Xinjiang	Not quite clear
Negative	2018	female	4	negative	Southern Xinjiang	Not quite clear
Negative	2018	male	4	negative	Southern Xinjiang	Not quite clear
Negative	2018	female	4	negative	Southern Xinjiang	Not quite clear
Negative	2018	female	4	negative	Southern Xinjiang	Not quite clear
Negative	2018	male	4	negative	Southern Xinjiang	Not quite clear
Negative	2018	female	4	negative	Southern Xinjiang	Not quite clear
Positive	2018	female	4	B	Southern Xinjiang	Not quite clear
Negative	2018	female	4	negative	Southern Xinjiang	Not quite clear
Negative	2018	male	4	negative	Southern Xinjiang	Not quite clear
Negative	2018	male	4	negative	Southern Xinjiang	Not quite clear
Negative	2018	female	3	negative	Southern Xinjiang	Not quite clear
Negative	2018	female	3	negative	Southern Xinjiang	Not quite clear
Negative	2018	male	4	negative	Southern Xinjiang	Not quite clear
Negative	2018	male	4	negative	Southern Xinjiang	Not quite clear
Negative	2018	male	5	negative	Southern Xinjiang	Not quite clear
Negative	2018	female	4	negative	Southern Xinjiang	Not quite clear
Negative	2018	male	4	negative	Southern Xinjiang	Not quite clear
Negative	2018	male	3	negative	Southern Xinjiang	Not quite clear
Negative	2018	male	4	negative	Southern Xinjiang	Not quite clear
Negative	2018	female	4	negative	Southern Xinjiang	Not quite clear
Negative	2018	male	3	negative	Southern Xinjiang	Not quite clear
Negative	2018	male	4	negative	Southern Xinjiang	Not quite clear
Negative	2018	female	4	negative	Southern Xinjiang	Not quite clear
Negative	2018	female	4	negative	Southern Xinjiang	Not quite clear
Negative	2018	female	4	negative	Southern Xinjiang	Not quite clear
Negative	2018	female	4	negative	Southern Xinjiang	Not quite clear
Negative	2018	female	4	negative	Southern Xinjiang	Not quite clear
Negative	2018	male	4	negative	Southern Xinjiang	Not quite clear
Negative	2018	female	4	negative	Southern Xinjiang	Not quite clear
Negative	2018	female	4	negative	Southern Xinjiang	Not quite clear
Negative	2018	female	4	negative	Southern Xinjiang	Not quite clear
Negative	2018	female	4	negative	Southern Xinjiang	Not quite clear
Negative	2018	female	4	negative	Southern Xinjiang	Not quite clear
Positive	2018	female	5	B	Southern Xinjiang	Not quite clear
Negative	2018	female	5	negative	Southern Xinjiang	Not quite clear
Positive	2018	female	4	B	Southern Xinjiang	Not quite clear
Negative	2018	female	4	negative	Southern Xinjiang	Not quite clear
Positive	2018	female	4	B	Southern Xinjiang	Not quite clear
Negative	2018	female	4	negative	Southern Xinjiang	Not quite clear
Positive	2018	female	4	Y	Southern Xinjiang	Not quite clear
Negative	2018	female	5	negative	Southern Xinjiang	Not quite clear
Negative	2018	female	5	negative	Southern Xinjiang	Not quite clear
Negative	2018	female	4	negative	Southern Xinjiang	Not quite clear
Negative	2018	female	4	negative	Southern Xinjiang	Not quite clear
Negative	2018	female	4	negative	Southern Xinjiang	Not quite clear
Negative	2018	female	5	negative	Southern Xinjiang	Not quite clear
Negative	2018	female	4	negative	Southern Xinjiang	Not quite clear
Positive	2018	female	4	Non-genogroup	Southern Xinjiang	Not quite clear
Negative	2018	female	4	negative	Southern Xinjiang	Not quite clear
Negative	2018	female	4	negative	Southern Xinjiang	Not quite clear
Negative	2018	female	4	negative	Southern Xinjiang	Not quite clear
Negative	2018	female	4	negative	Southern Xinjiang	Not quite clear
Negative	2018	female	4	negative	Southern Xinjiang	Not quite clear
Negative	2018	female	4	negative	Southern Xinjiang	Not quite clear
Negative	2018	female	4	negative	Southern Xinjiang	Not quite clear
Negative	2018	female	5	negative	Southern Xinjiang	Not quite clear
Negative	2018	male	4	negative	Southern Xinjiang	Not quite clear
Negative	2018	male	5	negative	Southern Xinjiang	Not quite clear
Negative	2018	male	4	negative	Southern Xinjiang	Not quite clear
Positive	2018	male	5	Non-genogroup	Southern Xinjiang	Not quite clear
Negative	2018	male	4	negative	Southern Xinjiang	Not quite clear
Negative	2018	male	5	negative	Southern Xinjiang	Not quite clear
Negative	2018	female	4	negative	Southern Xinjiang	Not quite clear
Positive	2018	female	4	Non-genogroup	Southern Xinjiang	Not quite clear
Negative	2018	female	4	negative	Southern Xinjiang	Not quite clear
Positive	2018	female	5	Non-genogroup	Southern Xinjiang	Not quite clear
Negative	2018	male	4	negative	Southern Xinjiang	Not quite clear
Negative	2018	male	5	negative	Southern Xinjiang	Not quite clear
Negative	2018	female	4	negative	Southern Xinjiang	Not quite clear
Negative	2018	female	4	negative	Southern Xinjiang	Not quite clear
Positive	2018	female	5	B	Southern Xinjiang	Not quite clear
Negative	2018	female	4	negative	Southern Xinjiang	Not quite clear
Negative	2018	female	4	negative	Southern Xinjiang	Not quite clear
Negative	2018	female	4	negative	Southern Xinjiang	Not quite clear
Negative	2018	female	3	negative	Southern Xinjiang	Not quite clear
Negative	2018	female	3	negative	Southern Xinjiang	Not quite clear
Negative	2018	female	3	negative	Southern Xinjiang	Not quite clear
Negative	2018	female	3	negative	Southern Xinjiang	Not quite clear
Negative	2018	female	2	negative	Southern Xinjiang	Not quite clear
Negative	2018	female	3	negative	Southern Xinjiang	1 dose
Negative	2018	female	3	negative	Southern Xinjiang	1 dose
Negative	2018	female	3	negative	Southern Xinjiang	2 dose
Negative	2018	female	3	negative	Southern Xinjiang	2 dose
Negative	2018	female	3	negative	Southern Xinjiang	≥3 dose
Negative	2018	female	3	negative	Southern Xinjiang	≥3 dose
Positive	2018	female	3	Non-genogroup	Southern Xinjiang	Not quite clear
Negative	2018	male	3	negative	Southern Xinjiang	1 dose
Negative	2018	male	3	negative	Southern Xinjiang	2 dose
Negative	2018	male	3	negative	Southern Xinjiang	≥3 dose
Negative	2018	male	2	negative	Southern Xinjiang	≥3 dose
Negative	2018	female	2	negative	Southern Xinjiang	Not quite clear
Negative	2018	female	3	negative	Southern Xinjiang	Not quite clear
Positive	2018	male	2	Y	Southern Xinjiang	2 dose
Negative	2018	male	2	negative	Southern Xinjiang	1 dose
Negative	2018	female	2	negative	Southern Xinjiang	Not quite clear
Negative	2018	male	3	negative	Southern Xinjiang	Not quite clear
Positive	2018	female	2	B	Southern Xinjiang	1 dose
Negative	2018	female	2	negative	Southern Xinjiang	Not quite clear
Negative	2018	male	2	negative	Southern Xinjiang	Not quite clear
Negative	2018	male	2	negative	Southern Xinjiang	Not quite clear
Positive	2018	female	3	B	Southern Xinjiang	≥3 dose
Negative	2018	male	3	negative	Southern Xinjiang	1 dose
Negative	2018	female	3	negative	Southern Xinjiang	Not quite clear
Negative	2018	male	3	negative	Southern Xinjiang	1 dose
Negative	2018	male	2	negative	Southern Xinjiang	1 dose
Negative	2018	female	2	negative	Southern Xinjiang	Not quite clear
Negative	2018	female	2	negative	Southern Xinjiang	≥3 dose
Negative	2018	female	2	negative	Southern Xinjiang	Not quite clear
Negative	2018	female	2	negative	Southern Xinjiang	2 dose
Positive	2018	male	2	B	Southern Xinjiang	Not quite clear
Negative	2018	male	2	negative	Southern Xinjiang	Not quite clear
Negative	2018	male	2	negative	Southern Xinjiang	1 dose
Positive	2018	male	3	B	Southern Xinjiang	Not quite clear
Negative	2018	male	2	negative	Southern Xinjiang	≥3 dose
Negative	2018	male	2	negative	Southern Xinjiang	1 dose
Negative	2018	male	1	negative	Southern Xinjiang	Not quite clear
Positive	2018	male	1	Non-genogroup	Southern Xinjiang	Not quite clear
Negative	2018	female	2	negative	Southern Xinjiang	Not quite clear
Negative	2018	male	1	negative	Southern Xinjiang	Not quite clear
Negative	2018	male	1	negative	Southern Xinjiang	Not quite clear
Negative	2018	female	1	negative	Southern Xinjiang	Not quite clear
Negative	2018	female	1	negative	Southern Xinjiang	Not quite clear
Negative	2018	male	1	negative	Southern Xinjiang	Not quite clear
Negative	2018	male	1	negative	Southern Xinjiang	Not quite clear
Negative	2018	female	1	negative	Southern Xinjiang	Not quite clear
Negative	2018	female	2	negative	Southern Xinjiang	Not quite clear
Negative	2018	male	1	negative	Southern Xinjiang	1 dose
Negative	2018	female	1	negative	Southern Xinjiang	1 dose
Negative	2018	male	1	negative	Southern Xinjiang	1 dose
Negative	2018	male	1	negative	Southern Xinjiang	1 dose
Negative	2018	male	1	negative	Southern Xinjiang	1 dose
Positive	2018	male	1	B	Southern Xinjiang	Not quite clear
Negative	2018	male	1	negative	Southern Xinjiang	1 dose
Positive	2018	male	1	B	Southern Xinjiang	1 dose
Positive	2018	male	1	Y	Southern Xinjiang	Not quite clear
Negative	2018	male	2	negative	Southern Xinjiang	Not quite clear
Positive	2018	female	1	B	Southern Xinjiang	≥3 dose
Negative	2018	female	1	negative	Southern Xinjiang	1 dose
Negative	2018	male	1	negative	Southern Xinjiang	1 dose
Negative	2018	female	2	negative	Southern Xinjiang	≥3 dose
Negative	2018	female	2	negative	Southern Xinjiang	≥3 dose
Positive	2018	female	2	C	Southern Xinjiang	1 dose
Negative	2018	male	2	negative	Southern Xinjiang	1 dose
Negative	2018	female	2	negative	Southern Xinjiang	1 dose
Negative	2018	female	2	negative	Southern Xinjiang	≥3 dose
Negative	2018	female	1	negative	Southern Xinjiang	1 dose
Negative	2018	female	1	negative	Southern Xinjiang	Not quite clear
Positive	2018	male	2	Non-genogroup	Southern Xinjiang	1 dose
Negative	2018	female	2	negative	Southern Xinjiang	1 dose
Positive	2018	female	2	Non-genogroup	Southern Xinjiang	1 dose
Negative	2018	female	1	negative	Southern Xinjiang	1 dose
Negative	2018	male	1	negative	Southern Xinjiang	Not quite clear
Negative	2018	female	2	negative	Southern Xinjiang	≥3 dose
Negative	2018	female	1	negative	Southern Xinjiang	Not quite clear
Negative	2018	male	1	negative	Southern Xinjiang	Not quite clear
Negative	2018	male	5	negative	Southern Xinjiang	Not quite clear
Positive	2018	male	6	Non-genogroup	Southern Xinjiang	Not quite clear
Negative	2018	male	5	negative	Southern Xinjiang	Not quite clear
Positive	2018	male	5	Non-genogroup	Southern Xinjiang	Not quite clear
Negative	2018	male	6	negative	Southern Xinjiang	Not quite clear
Negative	2018	male	6	negative	Southern Xinjiang	Not quite clear
Negative	2018	male	6	negative	Southern Xinjiang	Not quite clear
Positive	2018	male	6	B	Southern Xinjiang	Not quite clear
Positive	2018	male	6	Non-genogroup	Southern Xinjiang	Not quite clear
Negative	2018	male	6	negative	Southern Xinjiang	Not quite clear
Positive	2018	male	6	B	Southern Xinjiang	Not quite clear
Negative	2018	male	6	negative	Southern Xinjiang	Not quite clear
Negative	2018	male	6	negative	Southern Xinjiang	Not quite clear
Positive	2018	male	6	Non-genogroup	Southern Xinjiang	Not quite clear
Negative	2018	male	6	negative	Southern Xinjiang	Not quite clear
Negative	2018	male	6	negative	Southern Xinjiang	Not vaccinated
Negative	2018	male	6	negative	Southern Xinjiang	Not vaccinated
Negative	2018	male	6	negative	Southern Xinjiang	Not vaccinated
Negative	2018	male	6	negative	Southern Xinjiang	Not vaccinated
Positive	2018	male	6	B	Southern Xinjiang	Not vaccinated
Negative	2018	male	6	negative	Southern Xinjiang	Not vaccinated
Negative	2018	female	6	negative	Southern Xinjiang	Not vaccinated
Positive	2018	female	6	B	Southern Xinjiang	Not vaccinated
Positive	2018	female	6	Y	Southern Xinjiang	Not vaccinated
Positive	2018	female	6	B	Southern Xinjiang	Not vaccinated
Positive	2018	female	6	C	Southern Xinjiang	Not vaccinated
Positive	2018	male	6	C	Southern Xinjiang	Not vaccinated
Positive	2018	male	6	Non-genogroup	Southern Xinjiang	Not vaccinated
Negative	2018	male	6	negative	Southern Xinjiang	Not vaccinated
Positive	2018	male	6	C	Southern Xinjiang	Not vaccinated
Positive	2018	male	6	B	Southern Xinjiang	Not vaccinated
Negative	2018	male	6	negative	Southern Xinjiang	Not vaccinated
Negative	2018	male	6	negative	Southern Xinjiang	Not vaccinated
Negative	2018	male	6	negative	Southern Xinjiang	Not vaccinated
Negative	2018	male	6	negative	Southern Xinjiang	Not vaccinated
Negative	2018	male	6	negative	Southern Xinjiang	Not vaccinated
Positive	2018	female	6	Non-genogroup	Southern Xinjiang	Not vaccinated
Positive	2018	female	6	Y	Southern Xinjiang	Not vaccinated
Negative	2018	female	6	negative	Southern Xinjiang	Not vaccinated
Negative	2018	female	6	negative	Southern Xinjiang	Not vaccinated
Negative	2018	female	6	negative	Southern Xinjiang	Not vaccinated
Negative	2018	female	6	negative	Southern Xinjiang	Not vaccinated
Negative	2018	male	6	negative	Southern Xinjiang	Not vaccinated
Positive	2018	male	6	C	Southern Xinjiang	Not quite clear
Positive	2018	male	6	Non-genogroup	Southern Xinjiang	Not quite clear
Positive	2018	male	6	B	Southern Xinjiang	Not quite clear
Positive	2018	male	6	B	Southern Xinjiang	Not quite clear
Negative	2018	male	6	negative	Southern Xinjiang	Not quite clear
Positive	2018	male	5	Non-genogroup	Southern Xinjiang	Not quite clear
Negative	2018	male	6	negative	Southern Xinjiang	Not quite clear
Negative	2018	male	6	negative	Southern Xinjiang	Not quite clear
Positive	2018	male	6	B	Southern Xinjiang	Not quite clear
Negative	2018	male	6	negative	Southern Xinjiang	Not quite clear
Positive	2018	male	6	B	Southern Xinjiang	Not quite clear
Negative	2018	male	6	negative	Southern Xinjiang	Not quite clear
Negative	2018	male	6	negative	Southern Xinjiang	Not quite clear
Positive	2018	male	6	Non-genogroup	Southern Xinjiang	Not quite clear
Positive	2018	male	6	B	Southern Xinjiang	Not quite clear
Negative	2018	male	6	negative	Southern Xinjiang	Not vaccinated
Positive	2018	male	6	Y	Southern Xinjiang	Not vaccinated
Positive	2018	male	6	B	Southern Xinjiang	Not vaccinated
Negative	2018	male	6	negative	Southern Xinjiang	Not vaccinated
Negative	2018	male	6	negative	Southern Xinjiang	Not vaccinated
Positive	2018	male	6	C	Southern Xinjiang	Not vaccinated
Positive	2018	male	6	C	Southern Xinjiang	Not vaccinated
Positive	2018	male	6	C	Southern Xinjiang	Not vaccinated
Positive	2018	male	6	C	Southern Xinjiang	Not vaccinated
Positive	2018	male	6	Non-genogroup	Southern Xinjiang	Not vaccinated
Positive	2018	male	6	C	Southern Xinjiang	Not vaccinated
Positive	2018	male	6	C	Southern Xinjiang	Not vaccinated
Positive	2018	male	6	C	Southern Xinjiang	Not vaccinated
Positive	2018	male	6	Non-genogroup	Southern Xinjiang	Not vaccinated
Positive	2018	male	6	Non-genogroup	Southern Xinjiang	Not vaccinated
Positive	2018	male	6	C	Southern Xinjiang	Not vaccinated
Positive	2018	male	6	B	Southern Xinjiang	Not vaccinated
Negative	2018	male	6	negative	Southern Xinjiang	Not vaccinated
Negative	2018	male	6	negative	Southern Xinjiang	Not vaccinated
Positive	2018	male	6	Non-genogroup	Southern Xinjiang	Not vaccinated
Positive	2018	male	6	Non-genogroup	Southern Xinjiang	Not vaccinated
Positive	2018	male	6	Non-genogroup	Southern Xinjiang	Not vaccinated
Negative	2018	male	6	negative	Southern Xinjiang	Not vaccinated
Negative	2018	male	6	negative	Southern Xinjiang	Not vaccinated
Negative	2018	male	6	negative	Southern Xinjiang	Not vaccinated
Negative	2018	male	6	negative	Southern Xinjiang	Not vaccinated
Negative	2018	male	6	negative	Southern Xinjiang	Not vaccinated
Positive	2018	male	6	Non-genogroup	Southern Xinjiang	Not vaccinated
Negative	2018	male	6	negative	Southern Xinjiang	Not quite clear
Negative	2018	male	6	negative	Southern Xinjiang	Not quite clear
Positive	2018	male	6	Non-genogroup	Southern Xinjiang	Not quite clear
Positive	2018	male	6	B	Southern Xinjiang	Not quite clear
Negative	2018	male	5	negative	Southern Xinjiang	Not quite clear
Negative	2018	male	6	negative	Southern Xinjiang	Not quite clear
Positive	2018	male	5	C	Southern Xinjiang	Not quite clear
Positive	2018	male	5	B	Southern Xinjiang	Not quite clear
Negative	2018	male	6	negative	Southern Xinjiang	Not quite clear
Negative	2018	male	6	negative	Southern Xinjiang	Not quite clear
Negative	2018	male	6	negative	Southern Xinjiang	Not quite clear
Positive	2018	male	6	B	Southern Xinjiang	Not quite clear
Positive	2018	male	6	B	Southern Xinjiang	Not quite clear
Negative	2018	male	6	negative	Southern Xinjiang	Not quite clear
Negative	2018	male	6	negative	Southern Xinjiang	Not quite clear
Negative	2018	male	6	negative	Southern Xinjiang	Not vaccinated
Negative	2018	male	6	negative	Southern Xinjiang	Not vaccinated
Positive	2018	male	6	B	Southern Xinjiang	Not vaccinated
Negative	2018	male	6	negative	Southern Xinjiang	Not vaccinated
Negative	2018	male	6	negative	Southern Xinjiang	Not vaccinated
Negative	2018	male	6	negative	Southern Xinjiang	Not vaccinated
Negative	2018	male	6	negative	Southern Xinjiang	Not vaccinated
Negative	2018	male	6	negative	Southern Xinjiang	Not vaccinated
Negative	2018	male	6	negative	Southern Xinjiang	Not vaccinated
Negative	2018	male	6	negative	Southern Xinjiang	Not vaccinated
Positive	2018	male	6	Non-genogroup	Southern Xinjiang	Not vaccinated
Negative	2018	male	6	negative	Southern Xinjiang	Not vaccinated
Negative	2018	male	6	negative	Southern Xinjiang	Not vaccinated
Negative	2018	male	6	negative	Southern Xinjiang	Not vaccinated
Negative	2018	male	6	negative	Southern Xinjiang	Not vaccinated
Positive	2018	male	6	Non-genogroup	Southern Xinjiang	Not vaccinated
Positive	2018	male	6	Non-genogroup	Southern Xinjiang	Not vaccinated
Positive	2018	male	6	Non-genogroup	Southern Xinjiang	Not vaccinated
Negative	2018	male	6	negative	Southern Xinjiang	Not vaccinated
Negative	2018	male	6	negative	Southern Xinjiang	Not vaccinated
Negative	2018	male	6	negative	Southern Xinjiang	Not vaccinated
Negative	2018	male	6	negative	Southern Xinjiang	Not vaccinated
Negative	2018	male	6	negative	Southern Xinjiang	Not vaccinated
Negative	2018	male	6	negative	Southern Xinjiang	Not vaccinated
Negative	2018	male	6	negative	Southern Xinjiang	Not vaccinated
Negative	2018	female	6	negative	Southern Xinjiang	Not vaccinated
Negative	2018	female	6	negative	Southern Xinjiang	Not vaccinated
Positive	2018	female	6	Non-genogroup	Southern Xinjiang	Not vaccinated
Negative	2018	male	6	negative	Southern Xinjiang	Not quite clear
Negative	2018	male	6	negative	Southern Xinjiang	Not quite clear
Positive	2018	male	6	B	Southern Xinjiang	Not quite clear
Positive	2018	male	6	C	Southern Xinjiang	Not quite clear
Positive	2018	male	6	B	Southern Xinjiang	Not quite clear
Negative	2018	male	6	negative	Southern Xinjiang	Not quite clear
Negative	2018	male	6	negative	Southern Xinjiang	Not quite clear
Positive	2018	male	6	Non-genogroup	Southern Xinjiang	Not quite clear
Negative	2018	male	6	negative	Southern Xinjiang	Not quite clear
Negative	2018	male	6	negative	Southern Xinjiang	Not quite clear
Positive	2018	male	6	B	Southern Xinjiang	Not quite clear
Positive	2018	male	6	Non-genogroup	Southern Xinjiang	Not quite clear
Positive	2018	male	6	B	Southern Xinjiang	Not quite clear
Positive	2018	male	6	B	Southern Xinjiang	Not quite clear
Positive	2018	male	6	Y	Southern Xinjiang	Not quite clear
Positive	2018	male	6	Non-genogroup	Southern Xinjiang	Not quite clear
Negative	2018	male	6	negative	Southern Xinjiang	Not vaccinated
Negative	2018	male	6	negative	Southern Xinjiang	Not vaccinated
Positive	2018	male	6	B	Southern Xinjiang	Not vaccinated
Positive	2018	male	6	Non-genogroup	Southern Xinjiang	Not vaccinated
Negative	2018	male	6	negative	Southern Xinjiang	Not vaccinated
Negative	2018	male	6	negative	Southern Xinjiang	Not vaccinated
Negative	2018	male	6	negative	Southern Xinjiang	Not vaccinated
Negative	2018	male	6	negative	Southern Xinjiang	Not vaccinated
Positive	2018	male	6	B	Southern Xinjiang	Not vaccinated
Negative	2018	male	6	negative	Southern Xinjiang	Not vaccinated
Negative	2018	male	6	negative	Southern Xinjiang	Not vaccinated
Positive	2018	female	6	C	Southern Xinjiang	Not vaccinated
Positive	2018	female	6	Non-genogroup	Southern Xinjiang	Not vaccinated
Positive	2018	female	6	Non-genogroup	Southern Xinjiang	Not vaccinated
Negative	2018	female	6	negative	Southern Xinjiang	Not vaccinated
Negative	2018	female	6	negative	Southern Xinjiang	Not vaccinated
Negative	2018	female	6	negative	Southern Xinjiang	Not vaccinated
Negative	2018	female	6	negative	Southern Xinjiang	Not vaccinated
Negative	2018	female	6	negative	Southern Xinjiang	Not vaccinated
Negative	2018	female	6	negative	Southern Xinjiang	Not vaccinated
Positive	2018	female	6	Non-genogroup	Southern Xinjiang	Not vaccinated
Positive	2018	female	6	Non-genogroup	Southern Xinjiang	Not vaccinated
Negative	2018	male	6	negative	Southern Xinjiang	Not vaccinated
Negative	2018	male	6	negative	Southern Xinjiang	Not vaccinated
Negative	2018	male	6	negative	Southern Xinjiang	Not vaccinated
Negative	2018	male	6	negative	Southern Xinjiang	Not vaccinated
Negative	2018	male	6	negative	Southern Xinjiang	Not vaccinated
Negative	2018	male	6	negative	Southern Xinjiang	Not vaccinated
Negative	2018	male	6	negative	Southern Xinjiang	Not vaccinated
Positive	2018	male	6	B	Southern Xinjiang	Not vaccinated
Positive	2018	male	6	B	Southern Xinjiang	Not vaccinated
Positive	2018	male	6	C	Southern Xinjiang	Not vaccinated
Positive	2018	male	6	Non-genogroup	Southern Xinjiang	Not vaccinated
Positive	2018	male	6	Non-genogroup	Southern Xinjiang	Not vaccinated
Positive	2018	male	6	B	Southern Xinjiang	Not vaccinated
Positive	2018	male	6	B	Southern Xinjiang	Not vaccinated
Positive	2018	male	6	B	Southern Xinjiang	Not vaccinated
Positive	2018	female	6	C	Southern Xinjiang	Not vaccinated
Positive	2018	female	6	Non-genogroup	Southern Xinjiang	Not vaccinated
Negative	2018	female	6	negative	Southern Xinjiang	Not vaccinated
Negative	2018	female	6	negative	Southern Xinjiang	Not vaccinated
Positive	2018	female	6	Non-genogroup	Southern Xinjiang	Not vaccinated
Negative	2018	female	6	negative	Southern Xinjiang	Not vaccinated
Negative	2018	female	6	negative	Southern Xinjiang	Not vaccinated
Negative	2018	female	6	negative	Southern Xinjiang	Not vaccinated
Positive	2018	female	6	Non-genogroup	Southern Xinjiang	Not vaccinated
Positive	2018	female	6	Non-genogroup	Southern Xinjiang	Not vaccinated
Negative	2018	female	6	negative	Southern Xinjiang	Not vaccinated
Negative	2018	female	6	negative	Southern Xinjiang	Not vaccinated
Negative	2018	male	6	negative	Southern Xinjiang	Not vaccinated
Negative	2018	male	6	negative	Southern Xinjiang	Not vaccinated
Negative	2018	male	6	negative	Southern Xinjiang	Not vaccinated
Negative	2018	male	6	negative	Southern Xinjiang	Not vaccinated
Negative	2018	male	6	negative	Southern Xinjiang	Not vaccinated
Negative	2018	male	6	negative	Southern Xinjiang	Not vaccinated
Positive	2018	male	6	B	Southern Xinjiang	Not vaccinated
Positive	2022	male	4	Non-genogroup	Northern Xinjiang	Not vaccinated
Positive	2022	female	3	Non-genogroup	Northern Xinjiang	≥3 dose
Positive	2022	male	4	Non-genogroup	Northern Xinjiang	Not vaccinated
Positive	2022	male	4	Non-genogroup	Northern Xinjiang	≥3 dose
Positive	2022	female	6	Non-genogroup	Northern Xinjiang	Not quite clear
Positive	2022	female	4	Non-genogroup	Northern Xinjiang	≥3 dose
Positive	2022	male	5	Non-genogroup	Northern Xinjiang	Not quite clear
Positive	2022	female	5	X	Northern Xinjiang	Not vaccinated
Negative	2022	male	5	negative	Northern Xinjiang	Not quite clear
Positive	2022	female	5	Non-genogroup	Northern Xinjiang	Not quite clear
Positive	2022	male	5	Y	Northern Xinjiang	Not quite clear
Positive	2022	male	5	Y	Northern Xinjiang	Not quite clear
Negative	2022	female	5	negative	Northern Xinjiang	Not vaccinated
Negative	2022	male	5	negative	Northern Xinjiang	Not vaccinated
Negative	2022	male	2	negative	Northern Xinjiang	≥3 dose
Negative	2022	male	5	negative	Northern Xinjiang	Not vaccinated
Positive	2022	male	5	B	Northern Xinjiang	Not vaccinated
Positive	2022	female	4	B	Northern Xinjiang	Not vaccinated
Positive	2022	male	6	B	Northern Xinjiang	Not quite clear
Negative	2022	male	2	negative	Northern Xinjiang	≥3 dose
Positive	2022	male	5	B	Northern Xinjiang	Not quite clear
Positive	2022	female	4	B	Northern Xinjiang	Not quite clear
Negative	2022	female	3	negative	Northern Xinjiang	≥3 dose
Negative	2022	male	3	negative	Northern Xinjiang	≥3 dose
Negative	2022	female	3	negative	Northern Xinjiang	≥3 dose
Negative	2022	female	3	negative	Northern Xinjiang	≥3 dose
Negative	2022	female	3	negative	Northern Xinjiang	≥3 dose
Negative	2022	female	3	negative	Northern Xinjiang	≥3 dose
Negative	2022	female	3	negative	Northern Xinjiang	≥3 dose
Negative	2022	female	3	negative	Northern Xinjiang	≥3 dose
Negative	2022	female	3	negative	Northern Xinjiang	≥3 dose
Negative	2022	female	3	negative	Northern Xinjiang	≥3 dose
Negative	2022	female	3	negative	Northern Xinjiang	≥3 dose
Negative	2022	female	3	negative	Northern Xinjiang	≥3 dose
Negative	2022	male	3	negative	Northern Xinjiang	≥3 dose
Negative	2022	male	3	negative	Northern Xinjiang	≥3 dose
Negative	2022	female	3	negative	Northern Xinjiang	≥3 dose
Negative	2022	male	4	negative	Northern Xinjiang	≥3 dose
Negative	2022	male	4	negative	Northern Xinjiang	≥3 dose
Negative	2022	female	4	negative	Northern Xinjiang	≥3 dose
Negative	2022	male	4	negative	Northern Xinjiang	≥3 dose
Negative	2022	female	4	negative	Northern Xinjiang	≥3 dose
Negative	2022	female	4	negative	Northern Xinjiang	≥3 dose
Negative	2022	female	4	negative	Northern Xinjiang	≥3 dose
Negative	2022	female	4	negative	Northern Xinjiang	≥3 dose
Negative	2022	male	4	negative	Northern Xinjiang	Not vaccinated
Negative	2022	male	4	negative	Northern Xinjiang	≥3 dose
Negative	2022	male	4	negative	Northern Xinjiang	≥3 dose
Negative	2022	female	4	negative	Northern Xinjiang	Not vaccinated
Negative	2022	male	4	negative	Northern Xinjiang	≥3 dose
Negative	2022	male	4	negative	Northern Xinjiang	Not vaccinated
Negative	2022	male	3	negative	Northern Xinjiang	≥3 dose
Negative	2022	male	3	negative	Northern Xinjiang	≥3 dose
Negative	2022	male	3	negative	Northern Xinjiang	≥3 dose
Negative	2022	male	3	negative	Northern Xinjiang	≥3 dose
Negative	2022	female	3	negative	Northern Xinjiang	Not vaccinated
Negative	2022	male	3	negative	Northern Xinjiang	≥3 dose
Negative	2022	female	3	negative	Northern Xinjiang	≥3 dose
Negative	2022	female	3	negative	Northern Xinjiang	≥3 dose
Negative	2022	male	3	negative	Northern Xinjiang	≥3 dose
Negative	2022	male	3	negative	Northern Xinjiang	≥3 dose
Negative	2022	male	3	negative	Northern Xinjiang	≥3 dose
Negative	2022	male	3	negative	Northern Xinjiang	≥3 dose
Negative	2022	male	3	negative	Northern Xinjiang	≥3 dose
Negative	2022	female	3	negative	Northern Xinjiang	≥3 dose
Negative	2022	female	3	negative	Northern Xinjiang	≥3 dose
Negative	2022	male	3	negative	Northern Xinjiang	≥3 dose
Negative	2022	male	3	negative	Northern Xinjiang	Not quite clear
Negative	2022	male	3	negative	Northern Xinjiang	Not vaccinated
Negative	2022	male	3	negative	Northern Xinjiang	≥3 dose
Negative	2022	male	3	negative	Northern Xinjiang	≥3 dose
Negative	2022	male	3	negative	Northern Xinjiang	≥3 dose
Negative	2022	female	3	negative	Northern Xinjiang	≥3 dose
Negative	2022	male	3	negative	Northern Xinjiang	≥3 dose
Negative	2022	female	3	negative	Northern Xinjiang	≥3 dose
Negative	2022	male	3	negative	Northern Xinjiang	≥3 dose
Negative	2022	male	3	negative	Northern Xinjiang	≥3 dose
Negative	2022	male	3	negative	Northern Xinjiang	≥3 dose
Negative	2022	male	3	negative	Northern Xinjiang	≥3 dose
Negative	2022	male	3	negative	Northern Xinjiang	Not vaccinated
Negative	2022	male	3	negative	Northern Xinjiang	≥3 dose
Negative	2022	female	3	negative	Northern Xinjiang	≥3 dose
Negative	2022	female	3	negative	Northern Xinjiang	≥3 dose
Negative	2022	male	3	negative	Northern Xinjiang	≥3 dose
Negative	2022	male	3	negative	Northern Xinjiang	≥3 dose
Negative	2022	female	3	negative	Northern Xinjiang	≥3 dose
Negative	2022	female	3	negative	Northern Xinjiang	≥3 dose
Negative	2022	male	3	negative	Northern Xinjiang	≥3 dose
Negative	2022	female	3	negative	Northern Xinjiang	≥3 dose
Negative	2022	female	3	negative	Northern Xinjiang	≥3 dose
Negative	2022	male	3	negative	Northern Xinjiang	≥3 dose
Negative	2022	male	2	negative	Northern Xinjiang	≥3 dose
Negative	2022	male	3	negative	Northern Xinjiang	Not vaccinated
Negative	2022	female	3	negative	Northern Xinjiang	≥3 dose
Negative	2022	male	3	negative	Northern Xinjiang	Not vaccinated
Negative	2022	female	4	negative	Northern Xinjiang	Not vaccinated
Negative	2022	female	4	negative	Northern Xinjiang	Not vaccinated
Negative	2022	female	4	negative	Northern Xinjiang	Not vaccinated
Negative	2022	female	4	negative	Northern Xinjiang	≥3 dose
Negative	2022	female	4	negative	Northern Xinjiang	≥3 dose
Negative	2022	male	4	negative	Northern Xinjiang	≥3 dose
Negative	2022	female	4	negative	Northern Xinjiang	≥3 dose
Negative	2022	female	3	negative	Northern Xinjiang	2 dose
Negative	2022	male	4	negative	Northern Xinjiang	2 dose
Negative	2022	female	6	negative	Northern Xinjiang	Not vaccinated
Negative	2022	female	4	negative	Northern Xinjiang	Not vaccinated
Negative	2022	female	4	negative	Northern Xinjiang	≥3 dose
Negative	2022	female	4	negative	Northern Xinjiang	Not vaccinated
Negative	2022	male	4	negative	Northern Xinjiang	Not vaccinated
Negative	2022	female	4	negative	Northern Xinjiang	≥3 dose
Negative	2022	female	6	negative	Northern Xinjiang	Not vaccinated
Negative	2022	female	6	negative	Northern Xinjiang	Not vaccinated
Negative	2022	female	6	negative	Northern Xinjiang	Not vaccinated
Negative	2022	female	6	negative	Northern Xinjiang	Not vaccinated
Negative	2022	female	6	negative	Northern Xinjiang	Not vaccinated
Negative	2022	female	6	negative	Northern Xinjiang	Not vaccinated
Negative	2022	male	6	negative	Northern Xinjiang	Not vaccinated
Negative	2022	female	6	negative	Northern Xinjiang	Not vaccinated
Negative	2022	female	6	negative	Northern Xinjiang	Not vaccinated
Negative	2022	male	6	negative	Northern Xinjiang	Not vaccinated
Negative	2022	female	4	negative	Northern Xinjiang	≥3 dose
Negative	2022	female	4	negative	Northern Xinjiang	≥3 dose
Negative	2022	female	4	negative	Northern Xinjiang	Not vaccinated
Negative	2022	female	4	negative	Northern Xinjiang	≥3 dose
Negative	2022	female	4	negative	Northern Xinjiang	≥3 dose
Negative	2022	female	4	negative	Northern Xinjiang	Not vaccinated
Negative	2022	male	4	negative	Northern Xinjiang	Not vaccinated
Negative	2022	female	4	negative	Northern Xinjiang	≥3 dose
Negative	2022	female	4	negative	Northern Xinjiang	≥3 dose
Negative	2022	male	4	negative	Northern Xinjiang	≥3 dose
Negative	2022	male	4	negative	Northern Xinjiang	Not vaccinated
Negative	2022	female	4	negative	Northern Xinjiang	Not vaccinated
Negative	2022	female	4	negative	Northern Xinjiang	Not vaccinated
Negative	2022	male	4	negative	Northern Xinjiang	≥3 dose
Negative	2022	male	1	negative	Northern Xinjiang	2 dose
Negative	2022	male	4	negative	Northern Xinjiang	Not vaccinated
Negative	2022	male	4	negative	Northern Xinjiang	≥3 dose
Negative	2022	male	4	negative	Northern Xinjiang	Not vaccinated
Negative	2022	female	6	negative	Northern Xinjiang	≥3 dose
Negative	2022	male	4	negative	Northern Xinjiang	Not vaccinated
Negative	2022	male	4	negative	Northern Xinjiang	≥3 dose
Negative	2022	male	4	negative	Northern Xinjiang	Not vaccinated
Negative	2022	male	4	negative	Northern Xinjiang	Not vaccinated
Negative	2022	male	4	negative	Northern Xinjiang	Not vaccinated
Negative	2022	male	4	negative	Northern Xinjiang	Not vaccinated
Negative	2022	male	4	negative	Northern Xinjiang	≥3 dose
Negative	2022	male	4	negative	Northern Xinjiang	≥3 dose
Negative	2022	female	4	negative	Northern Xinjiang	≥3 dose
Negative	2022	female	4	negative	Northern Xinjiang	≥3 dose
Negative	2022	female	4	negative	Northern Xinjiang	Not vaccinated
Negative	2022	female	6	negative	Northern Xinjiang	Not vaccinated
Negative	2022	female	6	negative	Northern Xinjiang	Not vaccinated
Negative	2022	female	6	negative	Northern Xinjiang	Not vaccinated
Negative	2022	female	6	negative	Northern Xinjiang	Not vaccinated
Negative	2022	female	6	negative	Northern Xinjiang	Not vaccinated
Negative	2022	female	6	negative	Northern Xinjiang	Not vaccinated
Negative	2022	female	6	negative	Northern Xinjiang	Not vaccinated
Negative	2022	male	6	negative	Northern Xinjiang	Not vaccinated
Negative	2022	female	6	negative	Northern Xinjiang	Not vaccinated
Negative	2022	male	4	negative	Northern Xinjiang	≥3 dose
Negative	2022	male	4	negative	Northern Xinjiang	≥3 dose
Negative	2022	male	4	negative	Northern Xinjiang	Not vaccinated
Negative	2022	male	4	negative	Northern Xinjiang	≥3 dose
Negative	2022	male	4	negative	Northern Xinjiang	Not vaccinated
Negative	2022	male	4	negative	Northern Xinjiang	Not vaccinated
Negative	2022	male	4	negative	Northern Xinjiang	≥3 dose
Negative	2022	female	4	negative	Northern Xinjiang	Not vaccinated
Negative	2022	female	4	negative	Northern Xinjiang	Not vaccinated
Negative	2022	female	4	negative	Northern Xinjiang	Not vaccinated
Negative	2022	female	4	negative	Northern Xinjiang	Not vaccinated
Negative	2022	male	4	negative	Northern Xinjiang	Not vaccinated
Negative	2022	female	4	negative	Northern Xinjiang	≥3 dose
Negative	2022	female	4	negative	Northern Xinjiang	Not vaccinated
Negative	2022	male	6	negative	Northern Xinjiang	Not vaccinated
Negative	2022	female	5	negative	Northern Xinjiang	Not vaccinated
Negative	2022	male	5	negative	Northern Xinjiang	Not vaccinated
Negative	2022	male	5	negative	Northern Xinjiang	Not vaccinated
Negative	2022	male	5	negative	Northern Xinjiang	Not vaccinated
Negative	2022	male	5	negative	Northern Xinjiang	Not vaccinated
Negative	2022	male	5	negative	Northern Xinjiang	Not vaccinated
Negative	2022	male	5	negative	Northern Xinjiang	Not vaccinated
Negative	2022	male	5	negative	Northern Xinjiang	Not vaccinated
Negative	2022	male	5	negative	Northern Xinjiang	Not vaccinated
Negative	2022	female	5	negative	Northern Xinjiang	Not vaccinated
Negative	2022	male	5	negative	Northern Xinjiang	Not vaccinated
Negative	2022	female	5	negative	Northern Xinjiang	Not vaccinated
Negative	2022	female	5	negative	Northern Xinjiang	Not vaccinated
Negative	2022	female	5	negative	Northern Xinjiang	Not vaccinated
Negative	2022	male	5	negative	Northern Xinjiang	Not vaccinated
Negative	2022	male	5	negative	Northern Xinjiang	Not vaccinated
Negative	2022	female	5	negative	Northern Xinjiang	Not vaccinated
Negative	2022	male	5	negative	Northern Xinjiang	Not vaccinated
Negative	2022	male	5	negative	Northern Xinjiang	Not vaccinated
Negative	2022	male	5	negative	Northern Xinjiang	Not vaccinated
Negative	2022	male	5	negative	Northern Xinjiang	Not vaccinated
Negative	2022	female	5	negative	Northern Xinjiang	Not vaccinated
Negative	2022	male	5	negative	Northern Xinjiang	Not vaccinated
Negative	2022	female	5	negative	Northern Xinjiang	Not vaccinated
Negative	2022	female	5	negative	Northern Xinjiang	Not vaccinated
Negative	2022	female	5	negative	Northern Xinjiang	Not vaccinated
Negative	2022	male	5	negative	Northern Xinjiang	Not vaccinated
Negative	2022	male	5	negative	Northern Xinjiang	Not vaccinated
Negative	2022	male	5	negative	Northern Xinjiang	Not vaccinated
Negative	2022	male	5	negative	Northern Xinjiang	Not vaccinated
Negative	2022	male	5	negative	Northern Xinjiang	Not vaccinated
Negative	2022	male	5	negative	Northern Xinjiang	Not vaccinated
Negative	2022	female	5	negative	Northern Xinjiang	Not vaccinated
Negative	2022	female	5	negative	Northern Xinjiang	Not vaccinated
Negative	2022	female	5	negative	Northern Xinjiang	Not vaccinated
Negative	2022	female	5	negative	Northern Xinjiang	Not vaccinated
Negative	2022	female	5	negative	Northern Xinjiang	Not vaccinated
Negative	2022	female	5	negative	Northern Xinjiang	Not vaccinated
Negative	2022	female	5	negative	Northern Xinjiang	Not vaccinated
Negative	2022	female	5	negative	Northern Xinjiang	Not vaccinated
Negative	2022	male	5	negative	Northern Xinjiang	Not vaccinated
Negative	2022	female	4	negative	Northern Xinjiang	≥3 dose
Negative	2022	female	5	negative	Northern Xinjiang	Not vaccinated
Negative	2022	female	4	negative	Northern Xinjiang	Not vaccinated
Negative	2022	male	5	negative	Northern Xinjiang	Not vaccinated
Negative	2022	female	5	negative	Northern Xinjiang	Not vaccinated
Negative	2022	female	5	negative	Northern Xinjiang	Not vaccinated
Negative	2022	female	5	negative	Northern Xinjiang	Not vaccinated
Negative	2022	female	5	negative	Northern Xinjiang	≥3 dose
Negative	2022	female	6	negative	Northern Xinjiang	Not quite clear
Negative	2022	male	2	negative	Northern Xinjiang	≥3 dose
Negative	2022	female	6	negative	Northern Xinjiang	Not quite clear
Negative	2022	female	6	negative	Northern Xinjiang	Not quite clear
Negative	2022	male	2	negative	Northern Xinjiang	≥3 dose
Negative	2022	female	2	negative	Northern Xinjiang	≥3 dose
Negative	2022	female	2	negative	Northern Xinjiang	≥3 dose
Negative	2022	male	2	negative	Northern Xinjiang	Not vaccinated
Negative	2022	male	2	negative	Northern Xinjiang	≥3 dose
Negative	2022	male	5	negative	Northern Xinjiang	Not vaccinated
Negative	2022	male	2	negative	Northern Xinjiang	2 dose
Negative	2022	male	5	negative	Northern Xinjiang	≥3 dose
Negative	2022	male	5	negative	Northern Xinjiang	Not vaccinated
Negative	2022	male	5	negative	Northern Xinjiang	Not vaccinated
Negative	2022	female	2	negative	Northern Xinjiang	≥3 dose
Negative	2022	male	2	negative	Northern Xinjiang	≥3 dose
Negative	2022	male	4	negative	Northern Xinjiang	Not quite clear
Negative	2022	female	2	negative	Northern Xinjiang	≥3 dose
Negative	2022	male	4	negative	Northern Xinjiang	Not quite clear
Negative	2022	female	2	negative	Northern Xinjiang	≥3 dose
Negative	2022	male	2	negative	Northern Xinjiang	Not vaccinated
Negative	2022	female	3	negative	Northern Xinjiang	≥3 dose
Negative	2022	female	2	negative	Northern Xinjiang	≥3 dose
Negative	2022	male	4	negative	Northern Xinjiang	Not quite clear
Negative	2022	male	4	negative	Northern Xinjiang	Not quite clear
Negative	2022	male	1	negative	Northern Xinjiang	≥3 dose
Negative	2022	male	4	negative	Northern Xinjiang	Not quite clear
Negative	2022	male	1	negative	Northern Xinjiang	≥3 dose
Negative	2022	male	1	negative	Northern Xinjiang	≥3 dose
Negative	2022	male	2	negative	Northern Xinjiang	≥3 dose
Negative	2022	male	1	negative	Northern Xinjiang	≥3 dose
Negative	2022	male	2	negative	Northern Xinjiang	≥3 dose
Negative	2022	female	2	negative	Northern Xinjiang	≥3 dose
Negative	2022	female	1	negative	Northern Xinjiang	≥3 dose
Negative	2022	male	1	negative	Northern Xinjiang	≥3 dose
Negative	2022	male	4	negative	Northern Xinjiang	Not quite clear
Negative	2022	female	1	negative	Northern Xinjiang	≥3 dose
Negative	2022	male	4	negative	Northern Xinjiang	Not quite clear
Negative	2022	male	4	negative	Northern Xinjiang	Not quite clear
Negative	2022	female	1	negative	Northern Xinjiang	≥3 dose
Negative	2022	female	6	negative	Northern Xinjiang	Not vaccinated
Negative	2022	male	2	negative	Northern Xinjiang	≥3 dose
Negative	2022	female	4	negative	Northern Xinjiang	Not quite clear
Negative	2022	female	4	negative	Northern Xinjiang	Not quite clear
Negative	2022	female	4	negative	Northern Xinjiang	Not quite clear
Negative	2022	male	1	negative	Northern Xinjiang	≥3 dose
Negative	2022	female	1	negative	Northern Xinjiang	≥3 dose
Negative	2022	female	3	negative	Northern Xinjiang	≥3 dose
Negative	2022	female	3	negative	Northern Xinjiang	≥3 dose
Negative	2022	male	3	negative	Northern Xinjiang	≥3 dose
Negative	2022	male	2	negative	Northern Xinjiang	≥3 dose
Negative	2022	female	3	negative	Northern Xinjiang	≥3 dose
Negative	2022	male	2	negative	Northern Xinjiang	≥3 dose
Negative	2022	male	1	negative	Northern Xinjiang	≥3 dose
Negative	2022	female	4	negative	Northern Xinjiang	Not quite clear
Negative	2022	female	3	negative	Northern Xinjiang	≥3 dose
Negative	2022	female	3	negative	Northern Xinjiang	≥3 dose
Negative	2022	male	2	negative	Northern Xinjiang	≥3 dose
Negative	2022	male	3	negative	Northern Xinjiang	≥3 dose
Negative	2022	male	2	negative	Northern Xinjiang	≥3 dose
Negative	2022	male	1	negative	Northern Xinjiang	≥3 dose
Negative	2022	male	1	negative	Northern Xinjiang	≥3 dose
Negative	2022	male	3	negative	Northern Xinjiang	≥3 dose
Negative	2022	male	2	negative	Northern Xinjiang	≥3 dose
Negative	2022	female	2	negative	Northern Xinjiang	≥3 dose
Negative	2022	male	1	negative	Northern Xinjiang	≥3 dose
Negative	2022	female	1	negative	Northern Xinjiang	≥3 dose
Negative	2022	female	3	negative	Northern Xinjiang	≥3 dose
Negative	2022	female	3	negative	Northern Xinjiang	≥3 dose
Negative	2022	male	3	negative	Northern Xinjiang	≥3 dose
Negative	2022	female	4	negative	Northern Xinjiang	Not quite clear
Negative	2022	female	3	negative	Northern Xinjiang	≥3 dose
Negative	2022	female	1	negative	Northern Xinjiang	≥3 dose
Negative	2022	female	6	negative	Northern Xinjiang	Not quite clear
Negative	2022	female	6	negative	Northern Xinjiang	Not quite clear
Negative	2022	male	4	negative	Northern Xinjiang	Not quite clear
Negative	2022	male	3	negative	Northern Xinjiang	2 dose
Negative	2022	male	4	negative	Northern Xinjiang	Not quite clear
Negative	2022	male	5	negative	Northern Xinjiang	Not quite clear
Negative	2022	male	5	negative	Northern Xinjiang	Not quite clear
Negative	2022	female	1	negative	Northern Xinjiang	≥3 dose
Negative	2022	female	6	negative	Northern Xinjiang	Not quite clear
Negative	2022	female	6	negative	Northern Xinjiang	Not quite clear
Negative	2022	female	6	negative	Northern Xinjiang	Not quite clear
Negative	2022	male	6	negative	Northern Xinjiang	Not quite clear
Negative	2022	male	6	negative	Northern Xinjiang	Not quite clear
Negative	2022	male	6	negative	Northern Xinjiang	Not quite clear
Negative	2022	male	5	negative	Northern Xinjiang	Not quite clear
Negative	2022	male	2	negative	Northern Xinjiang	≥3 dose
Negative	2022	male	2	negative	Northern Xinjiang	≥3 dose
Negative	2022	female	1	negative	Northern Xinjiang	≥3 dose
Negative	2022	male	2	negative	Northern Xinjiang	≥3 dose
Negative	2022	male	5	negative	Northern Xinjiang	Not quite clear
Negative	2022	male	4	negative	Northern Xinjiang	≥3 dose
Negative	2022	male	4	negative	Northern Xinjiang	Not quite clear
Negative	2022	male	4	negative	Northern Xinjiang	≥3 dose
Negative	2022	male	4	negative	Northern Xinjiang	Not quite clear
Negative	2022	male	4	negative	Northern Xinjiang	≥3 dose
Negative	2022	male	4	negative	Northern Xinjiang	≥3 dose
Negative	2022	male	4	negative	Northern Xinjiang	≥3 dose
Positive	2022	female	5	B	Northern Xinjiang	Not quite clear
Negative	2022	male	4	negative	Northern Xinjiang	≥3 dose
Negative	2022	male	4	negative	Northern Xinjiang	≥3 dose
Negative	2022	male	4	negative	Northern Xinjiang	≥3 dose
Negative	2022	male	5	negative	Northern Xinjiang	Not quite clear
Negative	2022	female	3	negative	Northern Xinjiang	Not vaccinated
Negative	2022	female	4	negative	Northern Xinjiang	Not vaccinated
Negative	2022	male	4	negative	Northern Xinjiang	Not vaccinated
Negative	2022	male	4	negative	Northern Xinjiang	Not vaccinated
Negative	2022	male	4	negative	Northern Xinjiang	≥3 dose
Negative	2022	female	4	negative	Northern Xinjiang	≥3 dose
Negative	2022	female	4	negative	Northern Xinjiang	≥3 dose
Negative	2022	male	4	negative	Northern Xinjiang	Not quite clear
Negative	2022	female	4	negative	Northern Xinjiang	≥3 dose
Negative	2022	male	2	negative	Northern Xinjiang	Not vaccinated
Negative	2022	male	4	negative	Northern Xinjiang	2 dose
Negative	2022	female	4	negative	Northern Xinjiang	≥3 dose
Negative	2022	male	2	negative	Northern Xinjiang	Not vaccinated
Negative	2022	male	2	negative	Northern Xinjiang	Not vaccinated
Negative	2022	female	4	negative	Northern Xinjiang	≥3 dose
Negative	2022	female	4	negative	Northern Xinjiang	≥3 dose
Negative	2022	male	4	negative	Northern Xinjiang	Not quite clear
Negative	2022	female	4	negative	Northern Xinjiang	≥3 dose
Negative	2022	male	4	negative	Northern Xinjiang	≥3 dose
Negative	2022	female	4	negative	Northern Xinjiang	≥3 dose
Negative	2022	male	4	negative	Northern Xinjiang	≥3 dose
Negative	2022	male	4	negative	Northern Xinjiang	≥3 dose
Negative	2022	male	4	negative	Northern Xinjiang	≥3 dose
Negative	2022	male	4	negative	Northern Xinjiang	Not quite clear
Negative	2022	female	4	negative	Northern Xinjiang	≥3 dose
Negative	2022	female	4	negative	Northern Xinjiang	≥3 dose
Negative	2022	female	2	negative	Northern Xinjiang	Not vaccinated
Negative	2022	female	5	negative	Northern Xinjiang	Not vaccinated
Negative	2022	female	4	negative	Northern Xinjiang	≥3 dose
Negative	2022	female	4	negative	Northern Xinjiang	≥3 dose
Negative	2022	male	2	negative	Northern Xinjiang	Not vaccinated
Negative	2022	male	4	negative	Northern Xinjiang	≥3 dose
Negative	2022	male	3	negative	Northern Xinjiang	Not vaccinated
Negative	2022	female	4	negative	Northern Xinjiang	≥3 dose
Negative	2022	male	2	negative	Northern Xinjiang	Not vaccinated
Negative	2022	male	4	negative	Northern Xinjiang	≥3 dose
Negative	2022	male	4	negative	Northern Xinjiang	≥3 dose
Negative	2022	male	5	negative	Northern Xinjiang	Not quite clear
Negative	2022	male	5	negative	Northern Xinjiang	Not quite clear
Negative	2022	female	5	negative	Northern Xinjiang	Not quite clear
Negative	2022	male	5	negative	Northern Xinjiang	Not quite clear
Negative	2022	male	1	negative	Northern Xinjiang	Not vaccinated
Negative	2022	male	5	negative	Northern Xinjiang	Not quite clear
Negative	2022	male	1	negative	Northern Xinjiang	Not vaccinated
Negative	2022	male	5	negative	Northern Xinjiang	≥3 dose
Negative	2022	male	5	negative	Northern Xinjiang	≥3 dose
Negative	2022	male	5	negative	Northern Xinjiang	Not quite clear
Negative	2022	male	5	negative	Northern Xinjiang	Not quite clear
Negative	2022	male	5	negative	Northern Xinjiang	Not quite clear
Negative	2022	male	5	negative	Northern Xinjiang	Not quite clear
Negative	2022	male	5	negative	Northern Xinjiang	Not quite clear
Negative	2022	male	5	negative	Northern Xinjiang	Not quite clear
Negative	2022	male	5	negative	Northern Xinjiang	Not quite clear
Negative	2022	male	1	negative	Northern Xinjiang	Not vaccinated
Negative	2022	male	5	negative	Northern Xinjiang	Not quite clear
Negative	2022	male	5	negative	Northern Xinjiang	Not quite clear
Negative	2022	female	4	negative	Northern Xinjiang	Not vaccinated
Negative	2022	male	5	negative	Northern Xinjiang	Not quite clear
Negative	2022	male	5	negative	Northern Xinjiang	Not quite clear
Negative	2022	male	5	negative	Northern Xinjiang	Not quite clear
Negative	2022	male	5	negative	Northern Xinjiang	Not quite clear
Negative	2022	male	5	negative	Northern Xinjiang	Not quite clear
Negative	2022	male	5	negative	Northern Xinjiang	Not quite clear
Negative	2022	male	5	negative	Northern Xinjiang	Not quite clear
Negative	2022	female	5	negative	Northern Xinjiang	Not quite clear
Negative	2022	female	5	negative	Northern Xinjiang	Not quite clear
Negative	2022	female	5	negative	Northern Xinjiang	Not quite clear
Negative	2022	female	5	negative	Northern Xinjiang	Not quite clear
Negative	2022	female	5	negative	Northern Xinjiang	Not quite clear
Negative	2022	female	5	negative	Northern Xinjiang	Not quite clear
Negative	2022	female	5	negative	Northern Xinjiang	Not quite clear
Negative	2022	female	5	negative	Northern Xinjiang	Not quite clear
Negative	2022	female	5	negative	Northern Xinjiang	Not quite clear
Negative	2022	female	5	negative	Northern Xinjiang	Not quite clear
Negative	2022	female	5	negative	Northern Xinjiang	Not quite clear
Negative	2022	female	5	negative	Northern Xinjiang	Not quite clear
Negative	2022	female	5	negative	Northern Xinjiang	Not quite clear
Negative	2022	female	4	negative	Northern Xinjiang	Not quite clear
Negative	2022	female	5	negative	Northern Xinjiang	≥3 dose
Negative	2022	female	5	negative	Northern Xinjiang	Not quite clear
Negative	2022	female	5	negative	Northern Xinjiang	Not quite clear
Negative	2022	female	5	negative	Northern Xinjiang	Not quite clear
Negative	2022	female	5	negative	Northern Xinjiang	Not quite clear
Negative	2022	female	5	negative	Northern Xinjiang	Not quite clear
Negative	2022	female	5	negative	Northern Xinjiang	Not quite clear
Negative	2022	male	5	negative	Northern Xinjiang	Not quite clear
Negative	2022	male	5	negative	Northern Xinjiang	Not quite clear
Negative	2022	male	5	negative	Northern Xinjiang	Not quite clear
Negative	2022	male	5	negative	Northern Xinjiang	≥3 dose
Negative	2022	male	5	negative	Northern Xinjiang	Not quite clear
Negative	2022	male	5	negative	Northern Xinjiang	Not quite clear
Negative	2022	male	5	negative	Northern Xinjiang	Not quite clear
Negative	2022	male	5	negative	Northern Xinjiang	Not quite clear
Negative	2022	male	5	negative	Northern Xinjiang	Not quite clear
Negative	2022	male	5	negative	Northern Xinjiang	Not quite clear
Negative	2022	male	5	negative	Northern Xinjiang	Not quite clear
Negative	2022	male	5	negative	Northern Xinjiang	Not quite clear
Negative	2022	male	5	negative	Northern Xinjiang	Not quite clear
Negative	2022	male	5	negative	Northern Xinjiang	≥3 dose
Negative	2022	male	5	negative	Northern Xinjiang	Not quite clear
Negative	2022	male	5	negative	Northern Xinjiang	Not quite clear
Negative	2022	male	5	negative	Northern Xinjiang	Not quite clear
Negative	2022	female	5	negative	Northern Xinjiang	Not quite clear
Negative	2022	female	4	negative	Northern Xinjiang	Not quite clear
Negative	2022	female	5	negative	Northern Xinjiang	Not quite clear
Negative	2022	female	5	negative	Northern Xinjiang	Not quite clear
Negative	2022	female	5	negative	Northern Xinjiang	Not quite clear
Negative	2022	female	4	negative	Northern Xinjiang	Not quite clear
Negative	2022	male	5	negative	Northern Xinjiang	Not quite clear
Negative	2022	male	5	negative	Northern Xinjiang	≥3 dose
Negative	2022	male	5	negative	Northern Xinjiang	Not quite clear
Negative	2022	male	5	negative	Northern Xinjiang	Not quite clear
Negative	2022	male	5	negative	Northern Xinjiang	Not quite clear
Negative	2022	female	5	negative	Northern Xinjiang	Not quite clear
Negative	2022	female	5	negative	Northern Xinjiang	Not quite clear
Negative	2022	female	5	negative	Northern Xinjiang	Not quite clear
Negative	2022	female	5	negative	Northern Xinjiang	Not quite clear
Negative	2022	female	5	negative	Northern Xinjiang	Not quite clear
Negative	2022	female	5	negative	Northern Xinjiang	Not quite clear
Negative	2022	female	5	negative	Northern Xinjiang	Not quite clear
Negative	2022	male	5	negative	Northern Xinjiang	Not quite clear
Negative	2022	male	5	negative	Northern Xinjiang	Not quite clear
Negative	2022	male	5	negative	Northern Xinjiang	Not quite clear
Negative	2022	female	5	negative	Northern Xinjiang	Not quite clear
Negative	2022	female	5	negative	Northern Xinjiang	Not quite clear
Negative	2022	female	5	negative	Northern Xinjiang	Not quite clear
Negative	2022	male	5	negative	Northern Xinjiang	Not quite clear
Negative	2022	male	5	negative	Northern Xinjiang	Not quite clear
Negative	2022	male	5	negative	Northern Xinjiang	Not quite clear
Negative	2022	male	4	negative	Northern Xinjiang	Not quite clear
Negative	2022	male	4	negative	Northern Xinjiang	Not quite clear
Negative	2022	female	4	negative	Northern Xinjiang	Not quite clear
Negative	2022	female	5	negative	Northern Xinjiang	Not quite clear
Negative	2022	female	4	negative	Northern Xinjiang	Not quite clear
Negative	2022	female	4	negative	Northern Xinjiang	Not quite clear
Negative	2022	male	5	negative	Northern Xinjiang	≥3 dose
Negative	2022	female	5	negative	Northern Xinjiang	Not quite clear
Negative	2022	male	4	negative	Northern Xinjiang	Not quite clear
Negative	2022	female	4	negative	Northern Xinjiang	≥3 dose
Negative	2022	female	4	negative	Northern Xinjiang	Not quite clear
Negative	2022	female	5	negative	Northern Xinjiang	Not quite clear
Negative	2022	female	4	negative	Northern Xinjiang	Not quite clear
Negative	2022	female	5	negative	Northern Xinjiang	Not quite clear
Negative	2022	male	4	negative	Northern Xinjiang	Not quite clear
Negative	2022	female	4	negative	Northern Xinjiang	Not quite clear
Negative	2022	male	5	negative	Northern Xinjiang	≥3 dose
Negative	2022	male	5	negative	Northern Xinjiang	Not quite clear
Negative	2022	male	4	negative	Northern Xinjiang	Not quite clear
Negative	2022	male	4	negative	Northern Xinjiang	Not quite clear
Negative	2022	male	5	negative	Northern Xinjiang	Not quite clear
Negative	2022	male	5	negative	Northern Xinjiang	Not quite clear
Negative	2022	male	5	negative	Northern Xinjiang	Not quite clear
Negative	2022	male	5	negative	Northern Xinjiang	≥3 dose
Negative	2022	male	4	negative	Northern Xinjiang	≥3 dose
Negative	2022	male	4	negative	Northern Xinjiang	≥3 dose
Negative	2022	male	5	negative	Northern Xinjiang	Not quite clear
Negative	2022	male	4	negative	Northern Xinjiang	Not quite clear
Negative	2022	male	1	negative	Northern Xinjiang	Not vaccinated
Negative	2022	male	5	negative	Northern Xinjiang	Not quite clear
Negative	2022	male	5	negative	Northern Xinjiang	Not quite clear
Negative	2022	female	5	negative	Northern Xinjiang	Not quite clear
Negative	2022	female	5	negative	Northern Xinjiang	≥3 dose
Negative	2022	female	5	negative	Northern Xinjiang	Not quite clear
Negative	2022	female	5	negative	Northern Xinjiang	Not quite clear
Negative	2022	female	4	negative	Northern Xinjiang	≥3 dose
Negative	2022	female	4	negative	Northern Xinjiang	Not quite clear
Negative	2022	female	5	negative	Northern Xinjiang	Not quite clear
Negative	2022	female	5	negative	Northern Xinjiang	Not quite clear
Negative	2022	female	4	negative	Northern Xinjiang	Not quite clear
Negative	2022	female	4	negative	Northern Xinjiang	Not quite clear
Negative	2022	female	4	negative	Northern Xinjiang	Not quite clear
Negative	2022	female	4	negative	Northern Xinjiang	2 dose
Negative	2022	female	5	negative	Northern Xinjiang	Not quite clear
Negative	2022	female	5	negative	Northern Xinjiang	Not quite clear
Negative	2022	female	5	negative	Northern Xinjiang	≥3 dose
Negative	2022	female	4	negative	Northern Xinjiang	Not quite clear
Negative	2022	female	5	negative	Northern Xinjiang	Not quite clear
Negative	2022	male	5	negative	Northern Xinjiang	Not quite clear
Positive	2018	female	4	Non-genogroup	Northern Xinjiang	Not quite clear
Positive	2018	male	4	Non-genogroup	Northern Xinjiang	Not quite clear
Positive	2018	female	4	Non-genogroup	Northern Xinjiang	Not quite clear
Positive	2018	male	4	Non-genogroup	Northern Xinjiang	Not quite clear
Positive	2018	female	3	Non-genogroup	Northern Xinjiang	≥3 dose
Positive	2018	male	1	Non-genogroup	Northern Xinjiang	1 dose
Positive	2018	female	2	Non-genogroup	Northern Xinjiang	≥3 dose
Positive	2018	male	5	Non-genogroup	Northern Xinjiang	Not quite clear
Positive	2018	female	5	Non-genogroup	Northern Xinjiang	Not quite clear
Positive	2018	female	5	Non-genogroup	Northern Xinjiang	Not quite clear
Positive	2018	female	5	Non-genogroup	Northern Xinjiang	Not quite clear
Positive	2018	female	5	Non-genogroup	Northern Xinjiang	Not quite clear
Positive	2018	female	2	W	Northern Xinjiang	≥3 dose
Positive	2018	male	2	W	Northern Xinjiang	≥3 dose
Positive	2018	male	6	B	Northern Xinjiang	Not quite clear
Positive	2018	female	6	B	Northern Xinjiang	Not quite clear
Positive	2018	male	4	B	Northern Xinjiang	Not quite clear
Positive	2018	male	4	B	Northern Xinjiang	Not quite clear
Positive	2018	female	4	B	Northern Xinjiang	Not quite clear
Positive	2018	female	3	B	Northern Xinjiang	≥3 dose
Positive	2018	female	3	B	Northern Xinjiang	≥3 dose
Positive	2018	male	6	B	Northern Xinjiang	Not quite clear
Positive	2018	male	1	B	Northern Xinjiang	1 dose
Positive	2018	male	1	B	Northern Xinjiang	1 dose
Positive	2018	male	2	B	Northern Xinjiang	≥3 dose
Positive	2018	male	5	B	Northern Xinjiang	Not quite clear
Positive	2018	female	5	B	Northern Xinjiang	Not quite clear
Negative	2018	female	6	negative	Northern Xinjiang	Not quite clear
Negative	2018	male	6	negative	Northern Xinjiang	Not quite clear
Negative	2018	male	6	negative	Northern Xinjiang	Not quite clear
Negative	2018	female	6	negative	Northern Xinjiang	Not quite clear
Negative	2018	female	6	negative	Northern Xinjiang	Not quite clear
Negative	2018	male	6	negative	Northern Xinjiang	Not quite clear
Negative	2018	female	6	negative	Northern Xinjiang	Not quite clear
Negative	2018	female	6	negative	Northern Xinjiang	Not quite clear
Negative	2018	male	6	negative	Northern Xinjiang	Not quite clear
Negative	2018	female	6	negative	Northern Xinjiang	Not quite clear
Negative	2018	male	6	negative	Northern Xinjiang	Not quite clear
Negative	2018	female	6	negative	Northern Xinjiang	Not quite clear
Negative	2018	female	6	negative	Northern Xinjiang	Not quite clear
Negative	2018	female	6	negative	Northern Xinjiang	Not quite clear
Negative	2018	female	6	negative	Northern Xinjiang	Not quite clear
Negative	2018	female	6	negative	Northern Xinjiang	Not quite clear
Negative	2018	male	6	negative	Northern Xinjiang	Not quite clear
Negative	2018	female	6	negative	Northern Xinjiang	Not quite clear
Negative	2018	male	4	negative	Northern Xinjiang	Not quite clear
Negative	2018	female	4	negative	Northern Xinjiang	Not quite clear
Negative	2018	male	4	negative	Northern Xinjiang	Not quite clear
Negative	2018	male	4	negative	Northern Xinjiang	Not quite clear
Negative	2018	female	4	negative	Northern Xinjiang	Not quite clear
Negative	2018	male	4	negative	Northern Xinjiang	Not quite clear
Negative	2018	male	4	negative	Northern Xinjiang	Not quite clear
Negative	2018	female	4	negative	Northern Xinjiang	Not quite clear
Negative	2018	male	4	negative	Northern Xinjiang	Not quite clear
Negative	2018	male	4	negative	Northern Xinjiang	Not quite clear
Negative	2018	female	4	negative	Northern Xinjiang	Not quite clear
Negative	2018	female	4	negative	Northern Xinjiang	Not quite clear
Negative	2018	male	4	negative	Northern Xinjiang	Not quite clear
Negative	2018	female	4	negative	Northern Xinjiang	Not quite clear
Negative	2018	female	4	negative	Northern Xinjiang	Not quite clear
Negative	2018	female	4	negative	Northern Xinjiang	Not quite clear
Negative	2018	male	4	negative	Northern Xinjiang	Not quite clear
Negative	2018	female	4	negative	Northern Xinjiang	Not quite clear
Negative	2018	female	4	negative	Northern Xinjiang	Not quite clear
Negative	2018	female	4	negative	Northern Xinjiang	Not quite clear
Negative	2018	male	4	negative	Northern Xinjiang	Not quite clear
Negative	2018	female	4	negative	Northern Xinjiang	Not quite clear
Negative	2018	male	4	negative	Northern Xinjiang	Not quite clear
Negative	2018	male	4	negative	Northern Xinjiang	Not quite clear
Negative	2018	female	4	negative	Northern Xinjiang	Not quite clear
Negative	2018	male	4	negative	Northern Xinjiang	Not quite clear
Negative	2018	male	4	negative	Northern Xinjiang	Not quite clear
Negative	2018	female	4	negative	Northern Xinjiang	Not quite clear
Negative	2018	male	4	negative	Northern Xinjiang	Not quite clear
Negative	2018	male	4	negative	Northern Xinjiang	Not quite clear
Negative	2018	male	4	negative	Northern Xinjiang	Not quite clear
Negative	2018	female	4	negative	Northern Xinjiang	Not quite clear
Negative	2018	male	3	negative	Northern Xinjiang	≥3 dose
Negative	2018	male	3	negative	Northern Xinjiang	≥3 dose
Negative	2018	female	3	negative	Northern Xinjiang	≥3 dose
Negative	2018	male	3	negative	Northern Xinjiang	≥3 dose
Negative	2018	male	3	negative	Northern Xinjiang	≥3 dose
Negative	2018	male	3	negative	Northern Xinjiang	≥3 dose
Negative	2018	male	3	negative	Northern Xinjiang	≥3 dose
Negative	2018	female	3	negative	Northern Xinjiang	≥3 dose
Negative	2018	female	3	negative	Northern Xinjiang	≥3 dose
Negative	2018	male	3	negative	Northern Xinjiang	≥3 dose
Negative	2018	male	3	negative	Northern Xinjiang	≥3 dose
Negative	2018	female	3	negative	Northern Xinjiang	≥3 dose
Negative	2018	male	3	negative	Northern Xinjiang	≥3 dose
Negative	2018	female	3	negative	Northern Xinjiang	≥3 dose
Negative	2018	male	3	negative	Northern Xinjiang	≥3 dose
Negative	2018	male	3	negative	Northern Xinjiang	≥3 dose
Negative	2018	male	3	negative	Northern Xinjiang	≥3 dose
Negative	2018	male	3	negative	Northern Xinjiang	≥3 dose
Negative	2018	male	3	negative	Northern Xinjiang	≥3 dose
Negative	2018	male	3	negative	Northern Xinjiang	≥3 dose
Negative	2018	female	3	negative	Northern Xinjiang	≥3 dose
Negative	2018	male	3	negative	Northern Xinjiang	≥3 dose
Negative	2018	male	3	negative	Northern Xinjiang	≥3 dose
Negative	2018	female	3	negative	Northern Xinjiang	≥3 dose
Negative	2018	female	3	negative	Northern Xinjiang	≥3 dose
Negative	2018	female	3	negative	Northern Xinjiang	≥3 dose
Negative	2018	male	3	negative	Northern Xinjiang	≥3 dose
Negative	2018	female	3	negative	Northern Xinjiang	≥3 dose
Negative	2018	female	3	negative	Northern Xinjiang	≥3 dose
Negative	2018	male	3	negative	Northern Xinjiang	≥3 dose
Negative	2018	male	3	negative	Northern Xinjiang	≥3 dose
Negative	2018	male	3	negative	Northern Xinjiang	≥3 dose
Negative	2018	male	3	negative	Northern Xinjiang	≥3 dose
Negative	2018	female	3	negative	Northern Xinjiang	≥3 dose
Negative	2018	female	3	negative	Northern Xinjiang	≥3 dose
Negative	2018	male	3	negative	Northern Xinjiang	≥3 dose
Negative	2018	male	3	negative	Northern Xinjiang	≥3 dose
Negative	2018	male	2	negative	Northern Xinjiang	≥3 dose
Negative	2018	female	1	negative	Northern Xinjiang	1 dose
Negative	2018	female	6	negative	Northern Xinjiang	Not quite clear
Negative	2018	female	6	negative	Northern Xinjiang	Not quite clear
Negative	2018	female	6	negative	Northern Xinjiang	Not quite clear
[truncated: 1,076 more rows]
